# Supplementary material for: Molecular understanding of the morphology and properties of lignin nanoparticles: unravelling the potential for tailored applications
Source: PubMed Central journal article supplement (PMC10243429; doi:10.1039/d3gc00703k), 2023-05-12
Supplement: GC-025-D3GC00703K-s001.pdf [file GC-025-D3GC00703K-s001.pdf]

## Supporting information

### Molecular understanding of the morphology and properties of lignin nanoparticles: Unravelling the potential for tailored applications

Ievgen V. Pylypchuk<sup>1§</sup>, Maria Karlsson<sup>2§</sup>, Pär A. Lindén<sup>2</sup>, Mikael Lindström<sup>1,2</sup>, Olena Sevastyanova<sup>1,2\*</sup> and Martin Lawoko<sup>1,2\*</sup>

#### Contents

|                                                                                        |    |
|----------------------------------------------------------------------------------------|----|
| <b>1. HSQC</b> .....                                                                   | 2  |
| 1.1. OS protected lignin.....                                                          | 2  |
| 1.2. OS reference lignin.....                                                          | 4  |
| 1.3. Kraft lignin .....                                                                | 6  |
| 1.4. Diagnostic shifts for HSQC assignment .....                                       | 8  |
| 1.5. Semi quantification of interunit linkages for the different type of lignins ..... | 8  |
| <b>2. <sup>31</sup>P NMR</b> .....                                                     | 9  |
| 2.1. Hydroxyl-functionalities for the different lignin.....                            | 9  |
| <b>3. Size Exclusion Chromatography (SEC)</b> .....                                    | 10 |
| 3.1. Molecular weight and dispersity index of lignin fractions.....                    | 10 |
| <b>4. <sup>1</sup>H NMR</b> .....                                                      | 10 |
| <b>5. NMR of LNPs</b> .....                                                            | 16 |
| <b>6. Scheme of biorefinery processes</b> .....                                        | 22 |
| 6.1. OS protected lignin.....                                                          | 22 |
| 6.2. OS reference lignin.....                                                          | 22 |
| <b>7. <sup>31</sup>P NMR spectra of ethanol fractions</b> .....                        | 23 |
| <b>8. Extraction and ethanol fractionation yield</b> .....                             | 28 |
| <b>9. Lignin structures</b> .....                                                      | 28 |
| <b>10. DFT: Molecular volume</b> .....                                                 | 29 |

# 1. HSQC

## 1.1. OS protected lignin

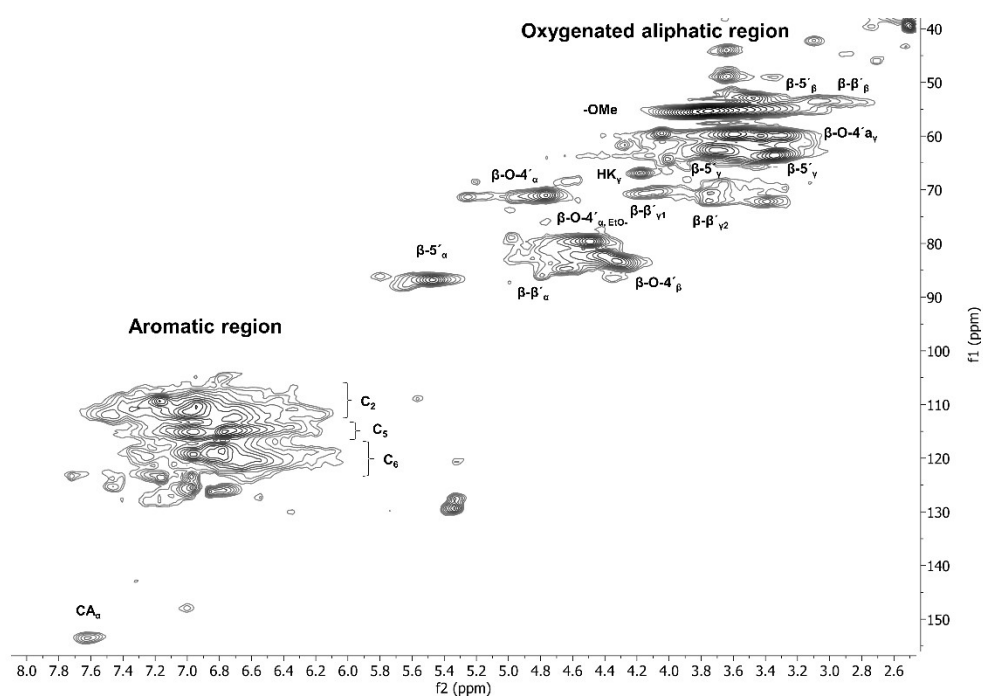

Figure S1. The OS protected lignin. f2 correspond to the  $^1\text{H}$  and f1 to the  $^{13}\text{C}$  dimension, respectively.

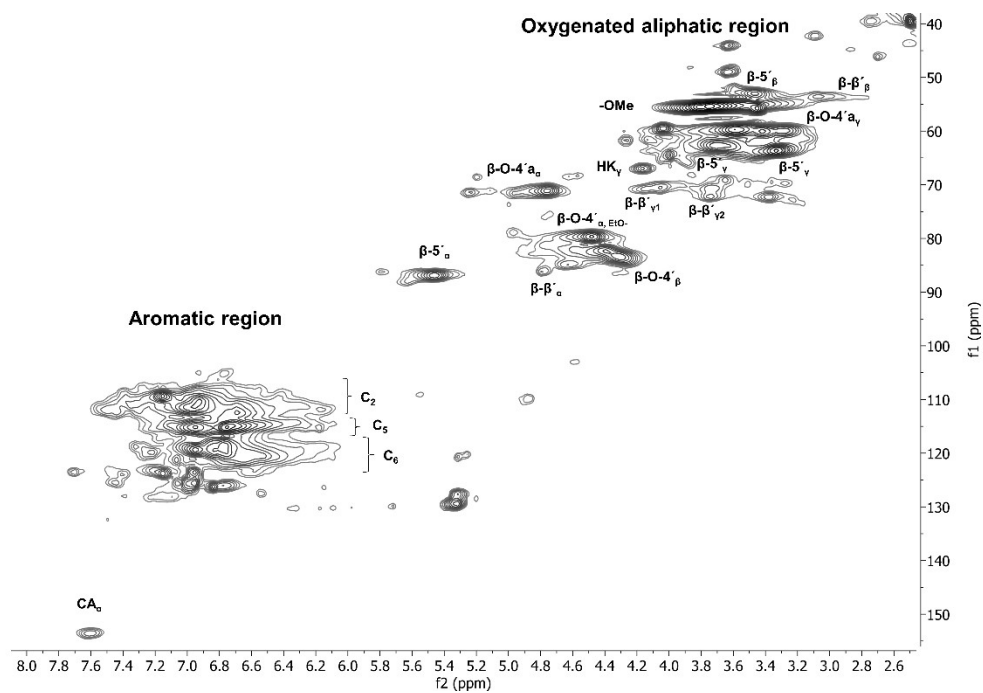

Figure S2. The ethanol soluble part of the fractionated OS protected lignin. f2 correspond to the  $^1\text{H}$  and f1 to the  $^{13}\text{C}$  dimension, respectively.

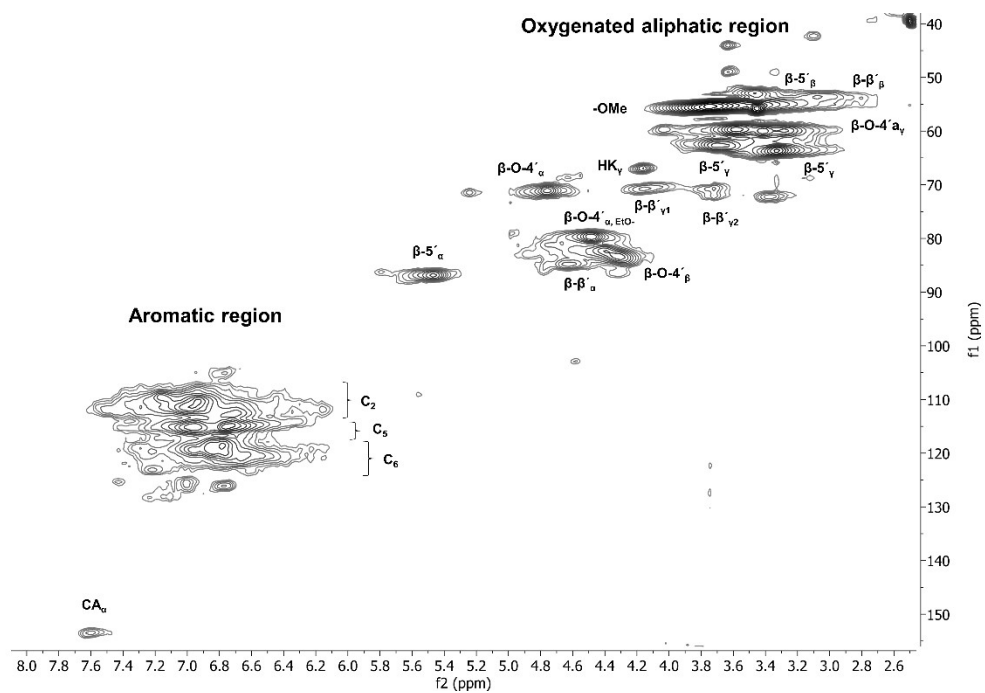

**Figure S3.** The ethanol insoluble part of the fractionated OS protected lignin. f2 correspond to the  $^1\text{H}$  and f1 to the  $^{13}\text{C}$  dimension, respectively.

## 1.2. OS reference lignin

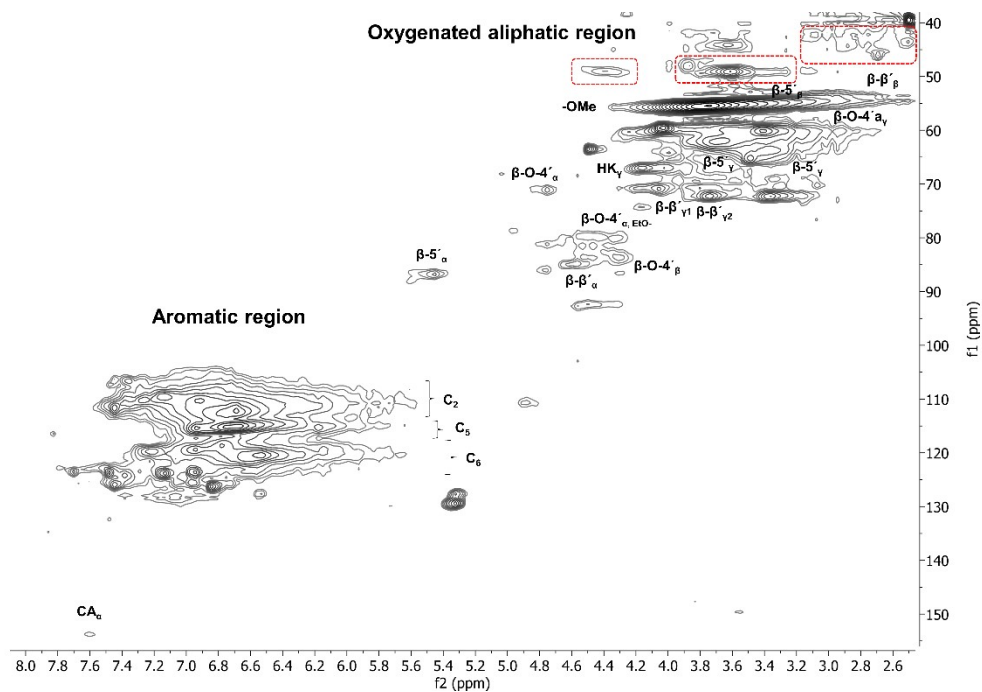

**Figure S4.** OS reference lignin. f2 correspond to the <sup>1</sup>H and f1 to the <sup>13</sup>C dimension, respectively. The signals from condensations between the aliphatic sidechain and aromatic ring is marked with red dotted rectangles.

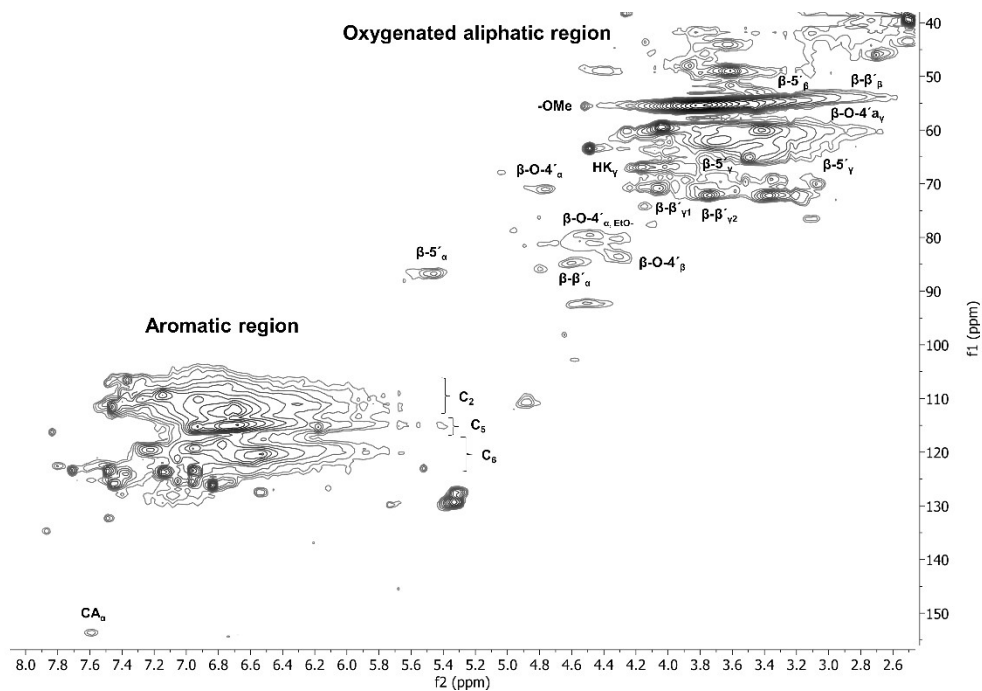

**Figure S5.** The ethanol soluble part of the fractionated OS reference lignin. f2 correspond to the <sup>1</sup>H and f1 to the <sup>13</sup>C dimension, respectively.

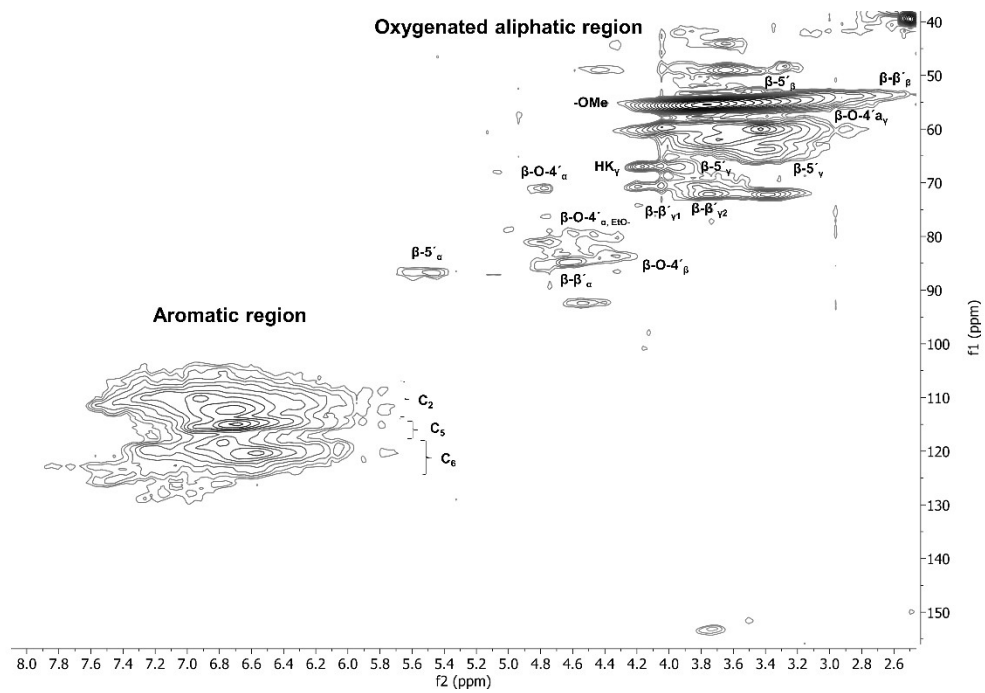

**Figure S6.** The ethanol insoluble part of the fractionated OS reference lignin. f2 correspond to the  $^1\text{H}$  and f1 to the  $^{13}\text{C}$  dimension, respectively.

### 1.3. Kraft lignin

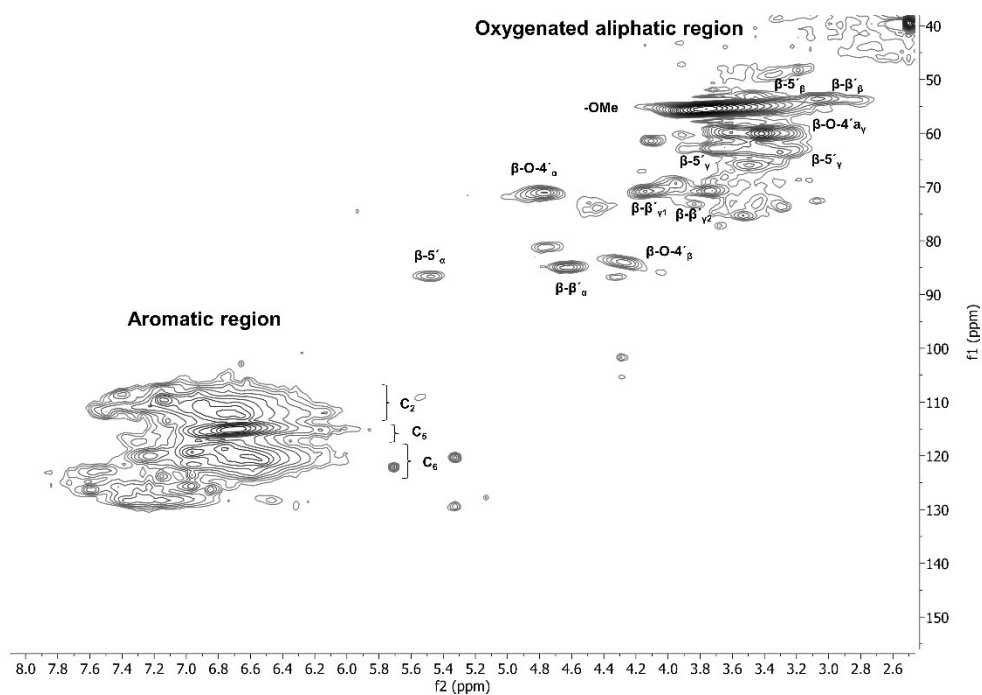

**Figure S7.** The kraft lignin. f2 correspond to the <sup>1</sup>H and f1 to the <sup>13</sup>C dimension, respectively.

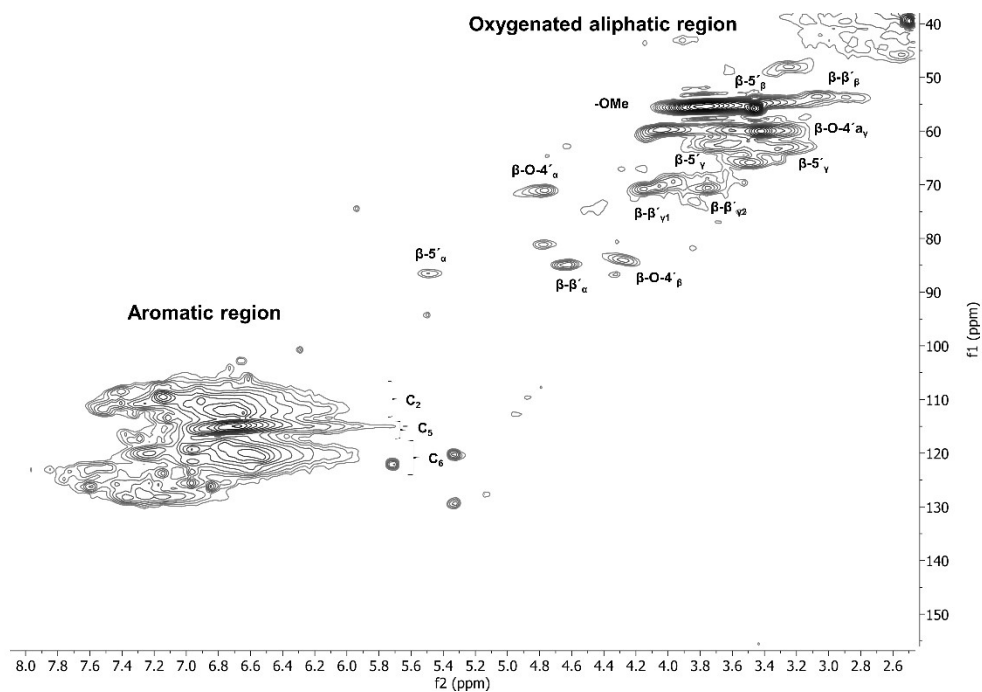

**Figure S8.** The ethanol soluble part of the fractionated kraft lignin. f2 correspond to the <sup>1</sup>H and f1 to the <sup>13</sup>C dimension, respectively.

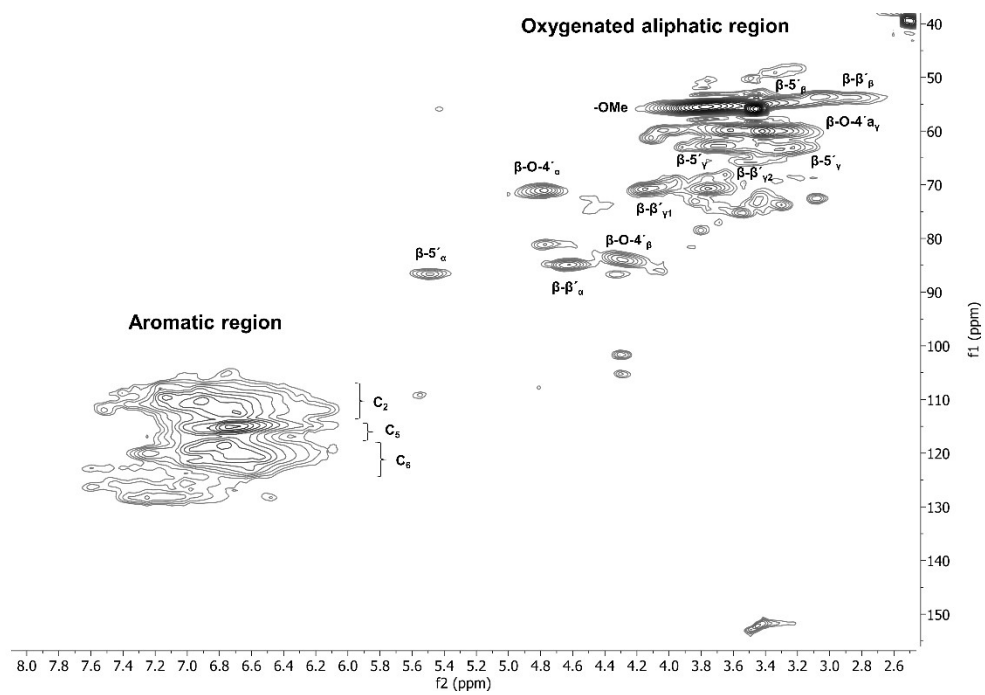

**Figure S9.** The ethanol insoluble part of the fractionated kraft lignin. f2 correspond to the  $^1\text{H}$  and f1 to the  $^{13}\text{C}$  dimension, respectively.

## 1.4. Diagnostic shifts for HSQC assignment

**Table S1.** Chemical shifts for integration of HSQC NMR spectra for inter-unit linkages.

| Chemical shifts | C2                                     | $\beta$ -O-4', C $_{\alpha}$ | $\beta$ -O-4', Et-C $_{\alpha}$ | $\beta$ -O-4', C $_{\beta}$ | $\beta$ -5', C $_{\alpha}$ | $\beta$ - $\beta$ ', C $_{\alpha}$ |
|-----------------|----------------------------------------|------------------------------|---------------------------------|-----------------------------|----------------------------|------------------------------------|
| $^1\text{H}$    | 7.8-6.1 (7.8-5.6) <sup>1</sup>         | 5.4-4.4                      | 4.7-4.0                         | 4.6-3.9                     | 5.8-5.0                    | 4.8-4.5                            |
| $^{13}\text{C}$ | 113.2-106.1 (113.2-101.9) <sup>1</sup> | 74.0-69.0                    | 81.4-76.9                       | 86.6-80.5                   | 91.0-83.2                  | 86.4-83.1                          |

<sup>1</sup>Larger integration of the C2 area for the 2h reference lignin and LignoBoost.

| Chemical shifts | Stilbene, $\beta$ -1', C $_{\alpha}$ | Stilbene, $\beta$ -5', C $_{\beta}$ | Coumarylaldehyde, C $_{\alpha}$ | HK, C $_{\gamma}$ |
|-----------------|--------------------------------------|-------------------------------------|---------------------------------|-------------------|
| $^1\text{H}$    | 127.8-124.4                          | 121.8-117.8                         | 155.5-151.7                     | 68.5-65.3         |
| $^{13}\text{C}$ | 7.1-6.9                              | 7.5-7.1                             | 7.7-7.4                         | 4.3-4.0           |

## 1.5. Semi quantification of interunit linkages for the different type of lignins

**Table S2.** Semi quantification of interunit linkages.

| Lignin                      | $\beta$ -O-4' | $\beta$ -5' | $\beta$ - $\beta$ ' | Stilbene $\beta$ -1', C $_{\alpha}$ | Stilbene $\beta$ -5', C $_{\beta}$ | Coumarylaldehyde, C $_{\alpha}$ | HK, C $_{\gamma}$ |
|-----------------------------|---------------|-------------|---------------------|-------------------------------------|------------------------------------|---------------------------------|-------------------|
| OS protected initial        | 32            | 12          | 2.0                 | 3.8                                 | 3.9                                | 2.0                             | 1.5               |
| OS protected EtOH soluble   | 33            | 12          | 1.7                 | 5.6                                 | 3.4                                | 2.1                             | 1.4               |
| OS protected EtOH insoluble | 33            | 12          | 2.9                 | 2.3                                 | 4.9                                | 2.1                             | 1.7               |
| OS reference initial        | 5.5           | 2.4         | 0.63                | 2.0                                 | 4.0                                | 0.29                            | 1.3               |
| OS reference EtOH soluble   | 5.1           | 2.4         | 0.48                | 2.2                                 | 4.0                                | 0.32                            | 1.3               |
| OS reference EtOH insoluble | 3.9           | 3.3         | 0.87                | 1.0                                 | 3.9                                | 0.25                            | 1.2               |
| Kraft initial               | 6.8           | 1.7         | 1.4                 | 2.9                                 | 6.2                                | n.d.                            | n.d.              |
| Kraft EtOH soluble          | 3.6           | 1.0         | 0.86                | 3.2                                 | 6.0                                | n.d.                            | n.d.              |
| Kraft EtOH insoluble        | 9.0           | 2.9         | 2.2                 | 2.4                                 | 4.5                                | n.d.                            | n.d.              |



## 2. <sup>31</sup>P NMR

### 2.1. Hydroxyl-functionalities for the different lignin

**Table S3.** Hydroxyl-functionality of the OS protected lignin.

|                            | <b>Aliphatic OH</b> | <b>C<sub>5</sub>-substituted OH</b> | <b>Guaiacyl OH</b> | <b><i>p</i>-hydroxy phenyl OH</b> | <b>Carboxylic acid OH</b> |
|----------------------------|---------------------|-------------------------------------|--------------------|-----------------------------------|---------------------------|
| <b>Chemical shift</b>      | 149.1-145.1         | 144.7-141.1                         | 140.6-138.8        | 138.2-137.3                       | 136.6-133.6               |
| <b>OS protected lignin</b> | mmol/g              | mmol/g                              | mmol/g             | mmol/g                            | mmol/g                    |
| Initial                    | 3.04                | 0.663                               | 1.31               | 0.0572                            | 0.166                     |
| EtOH soluble               | 3.09                | 0.578                               | 1.56               | 0.0629                            | 0.257                     |
| EtOH insoluble             | 2.95                | 0.738                               | 1.14               | 0.0625                            | 0.0625                    |

**Table S4.** Hydroxyl-functionality of the OS reference lignin.

|                       | <b>Aliphatic OH</b> | <b>C<sub>5</sub>-substituted OH</b> | <b>Guaiacyl OH</b> | <b><i>p</i>-hydroxy phenyl OH</b> | <b>Carboxylic acid OH</b> |
|-----------------------|---------------------|-------------------------------------|--------------------|-----------------------------------|---------------------------|
| <b>Chemical shift</b> | 149.1-145.1         | 144.7-141.1                         | 140.6-138.8        | 138.2-137.3                       | 136.6-133.6               |
| <b>OS reference</b>   | mmol/g              | mmol/g                              | mmol/g             | mmol/g                            | mmol/g                    |
| Initial               | 1.50                | 1.28                                | 1.88               | 0.149                             | 0.252                     |
| EtOH soluble          | 1.42                | 1.11                                | 2.15               | 0.121                             | 0.350                     |
| EtOH insoluble        | 1.57                | 1.45                                | 1.68               | 0.159                             | 0.193                     |

**Table S5.** Hydroxyl-functionality of the kraft lignin.

|                       | <b>Aliphatic OH</b> | <b>C<sub>5</sub>-substituted OH</b> | <b>Guaiacyl OH</b> | <b><i>p</i>-hydroxy phenyl OH</b> | <b>Carboxylic acid OH</b> |
|-----------------------|---------------------|-------------------------------------|--------------------|-----------------------------------|---------------------------|
| <b>Chemical shift</b> | 149.1-145.1         | 144.7-141.1                         | 140.6-138.8        | 138.2-137.3                       | 136.6-133.6               |
| <b>Kraft</b>          | mmol/g              | mmol/g                              | mmol/g             | mmol/g                            | mmol/g                    |
| Initial               | 1.76                | 1.28                                | 2.03               | 0.209                             | 0.508                     |
| EtOH soluble          | 1.34                | 1.50                                | 2.71               | 0.200                             | 0.616                     |
| EtOH insoluble        | 2.11                | 1.54                                | 1.77               | 0.165                             | 0.376                     |

### 3. Size Exclusion Chromatography (SEC)

#### 3.1. Molecular weight and dispersity index of lignin fractions

Table S6. Molecular weight and dispersity of the lignin fractions.

| Lignin                       | Mn<br>[g/mol] | Mw<br>[g/mol] | Mz<br>[g/mol] | Đ    |
|------------------------------|---------------|---------------|---------------|------|
| OS protected, initial        | 1800          | 7100          | 32000         | 3.88 |
| OS protected, EtOH soluble   | 1100          | 2000          | 3200          | 1.83 |
| OS protected, EtOH insoluble | 3900          | 11800         | 42800         | 3.05 |
| OS reference, initial        | 1500          | 5500          | 19000         | 3.68 |
| OS reference, EtOH soluble   | 800           | 1500          | 2400          | 1.78 |
| OS reference, EtOH insoluble | 3200          | 9700          | 27600         | 3.06 |
| Kraft, initial               | 1270          | 3100          | 7200          | 2.46 |
| Kraft, EtOH soluble          | 970           | 1800          | 3200          | 1.90 |
| Kraft, EtOH insoluble        | 2300          | 5300          | 9900          | 2.30 |

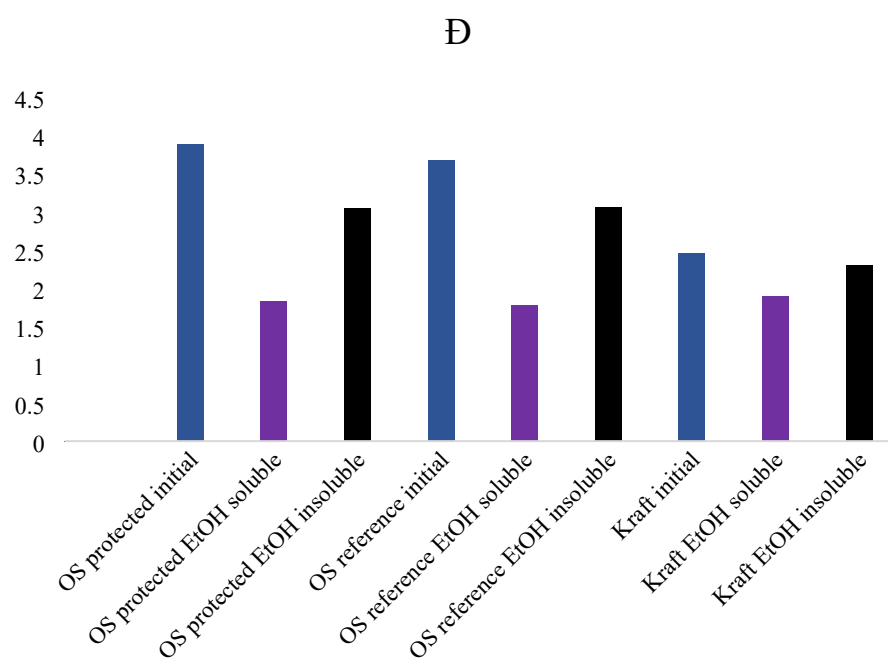

Figure S10. Dispersity index trends for the lignin fractions.

### 4. <sup>1</sup>H NMR

<sup>1</sup>H NMR of the unfractionated lignins, analysed in DMSO-d<sub>6</sub>.

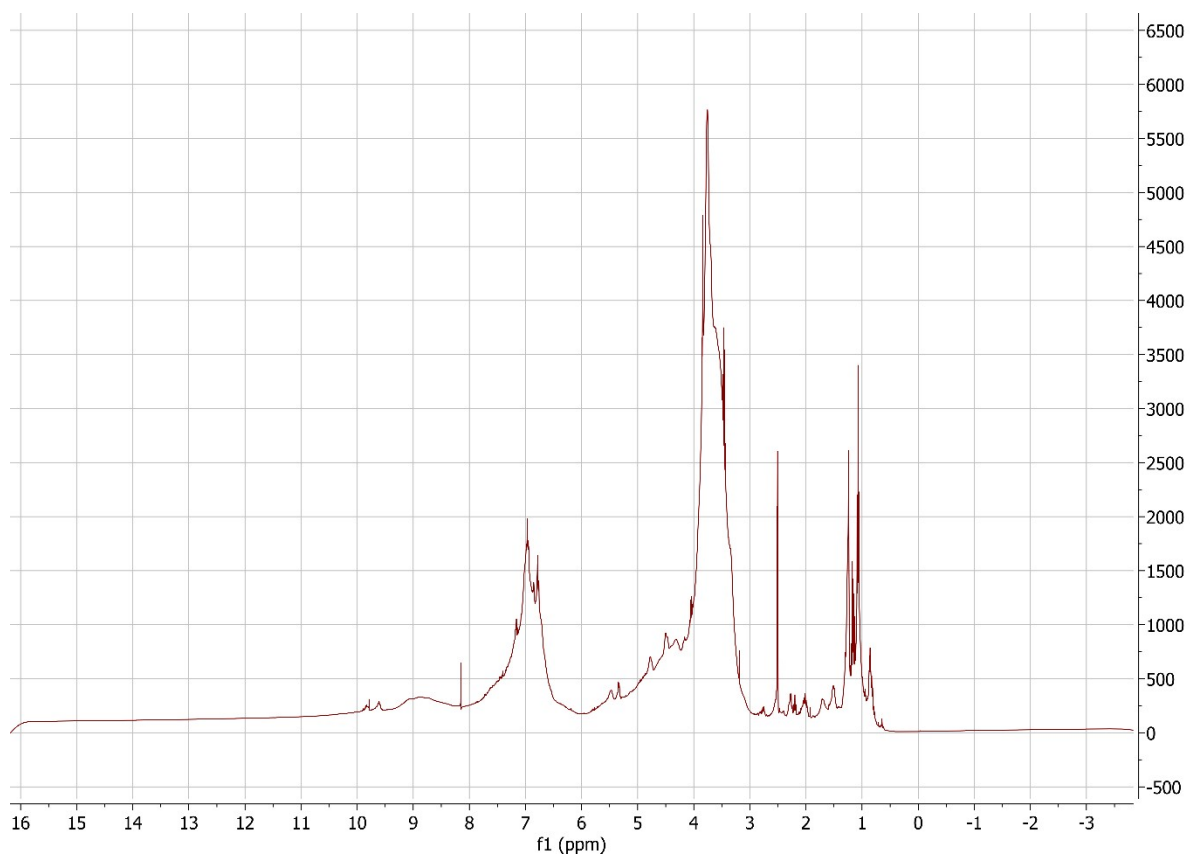

**Figure S11.** OS protected lignin, initial fraction

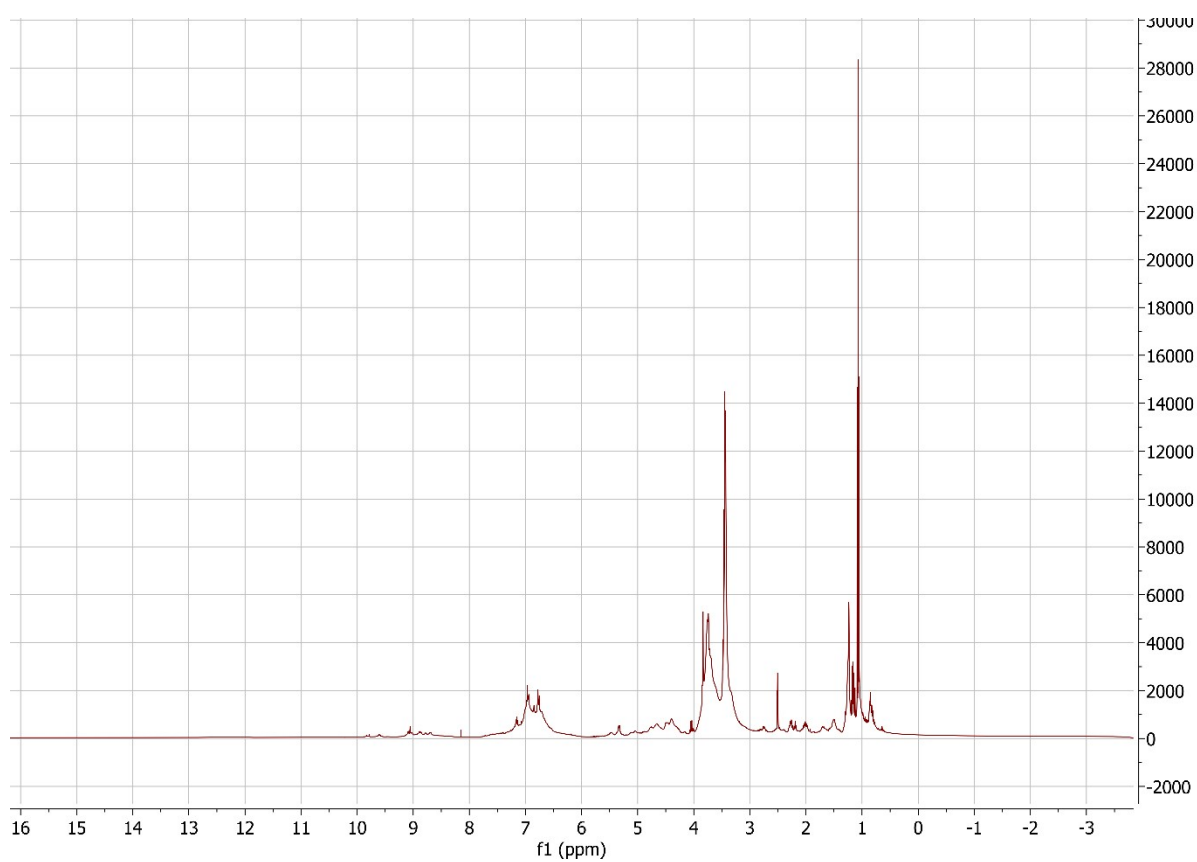

**Figure S12.** OS protected lignin, ethanol soluble fraction

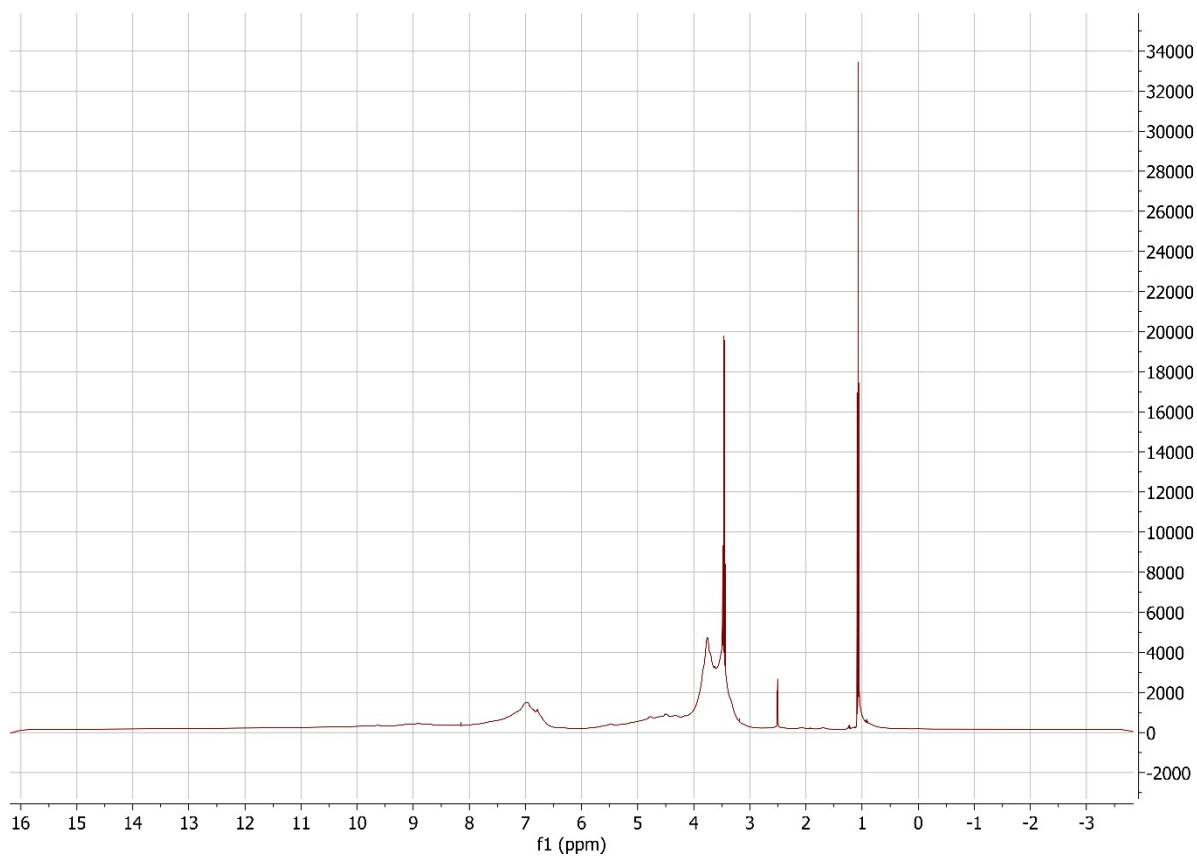

**Figure S13.** OS protected lignin, ethanol insoluble fraction

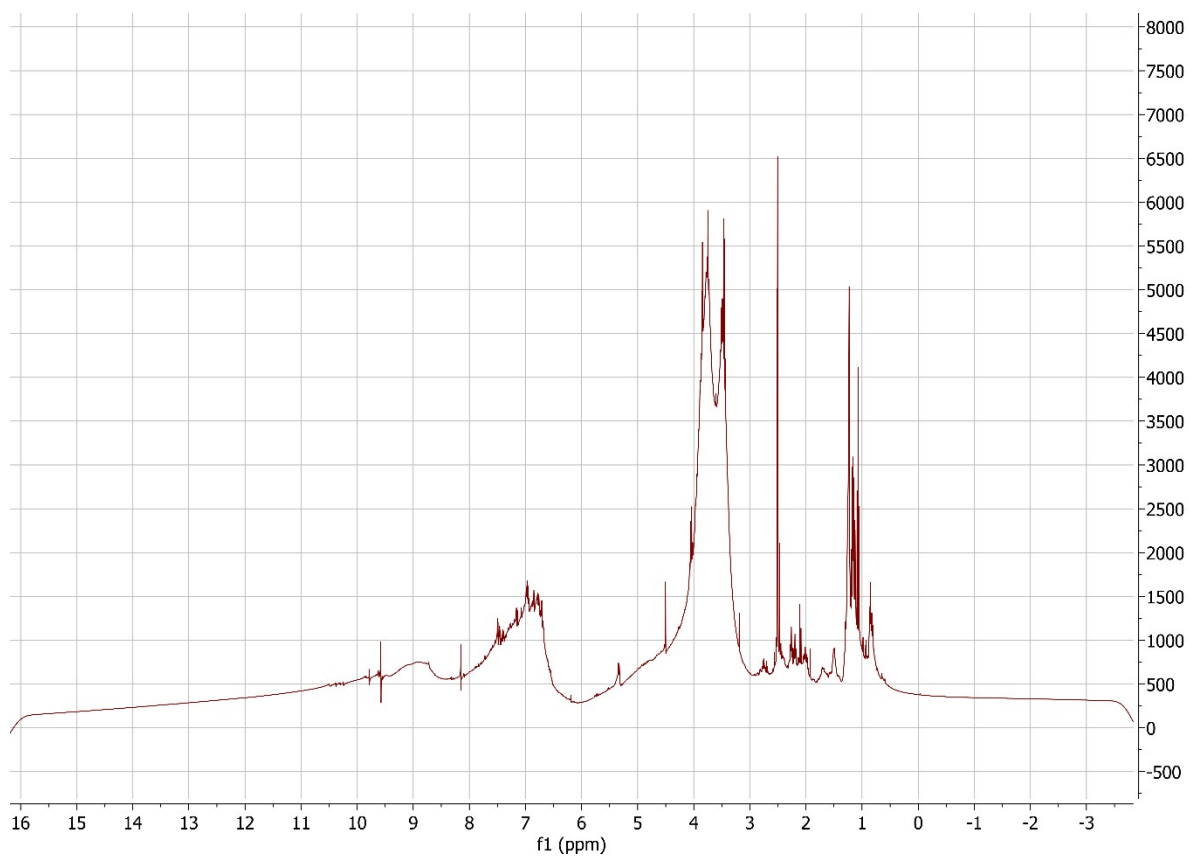

**Figure S14.** OS reference lignin, initial fraction

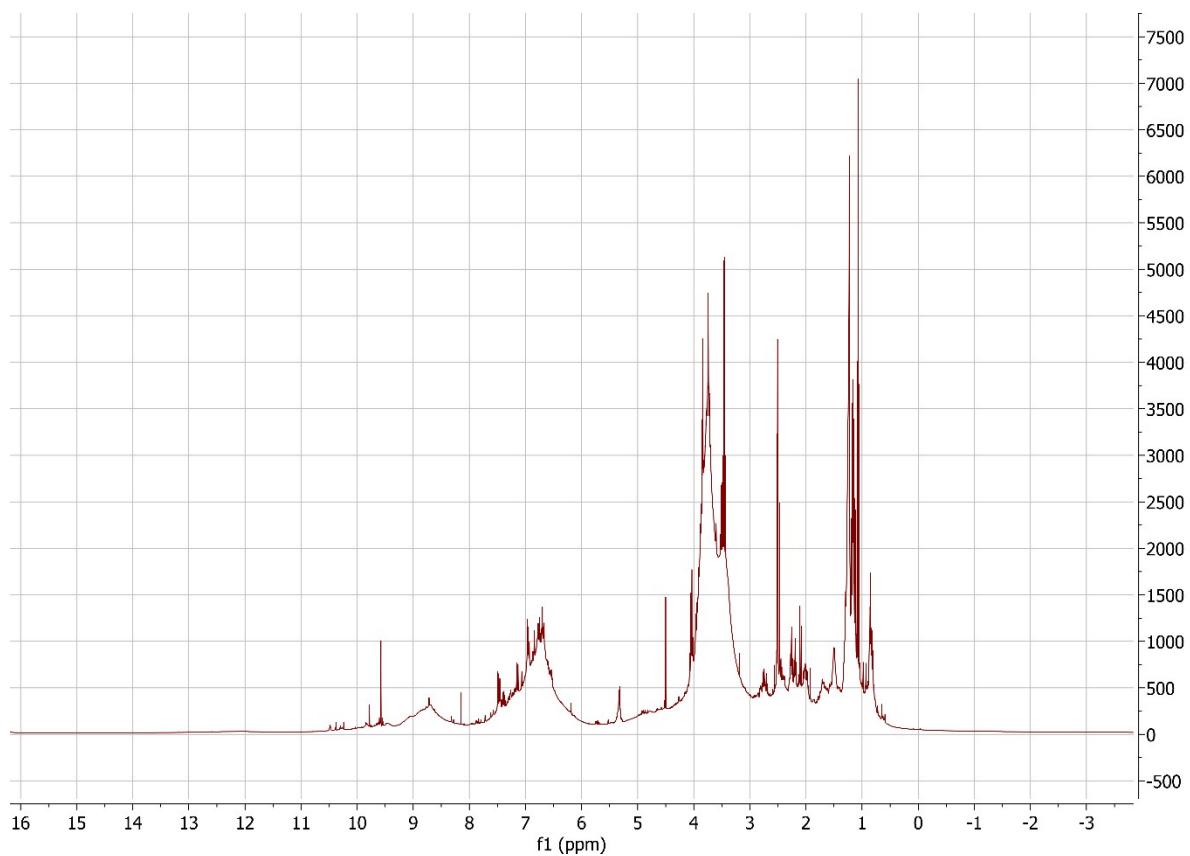

**Figure S15.** OS reference lignin, ethanol soluble fraction

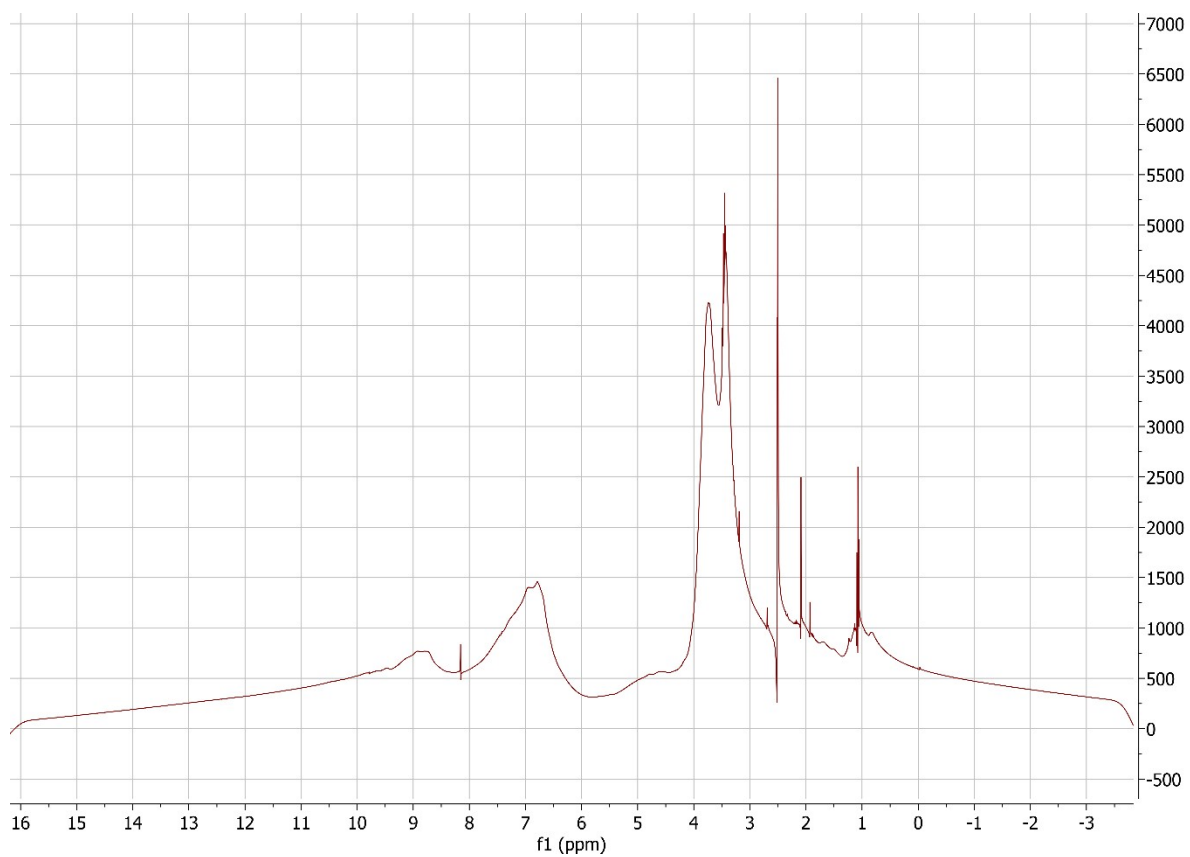

**Figure S16.** OS reference lignin, ethanol insoluble fraction

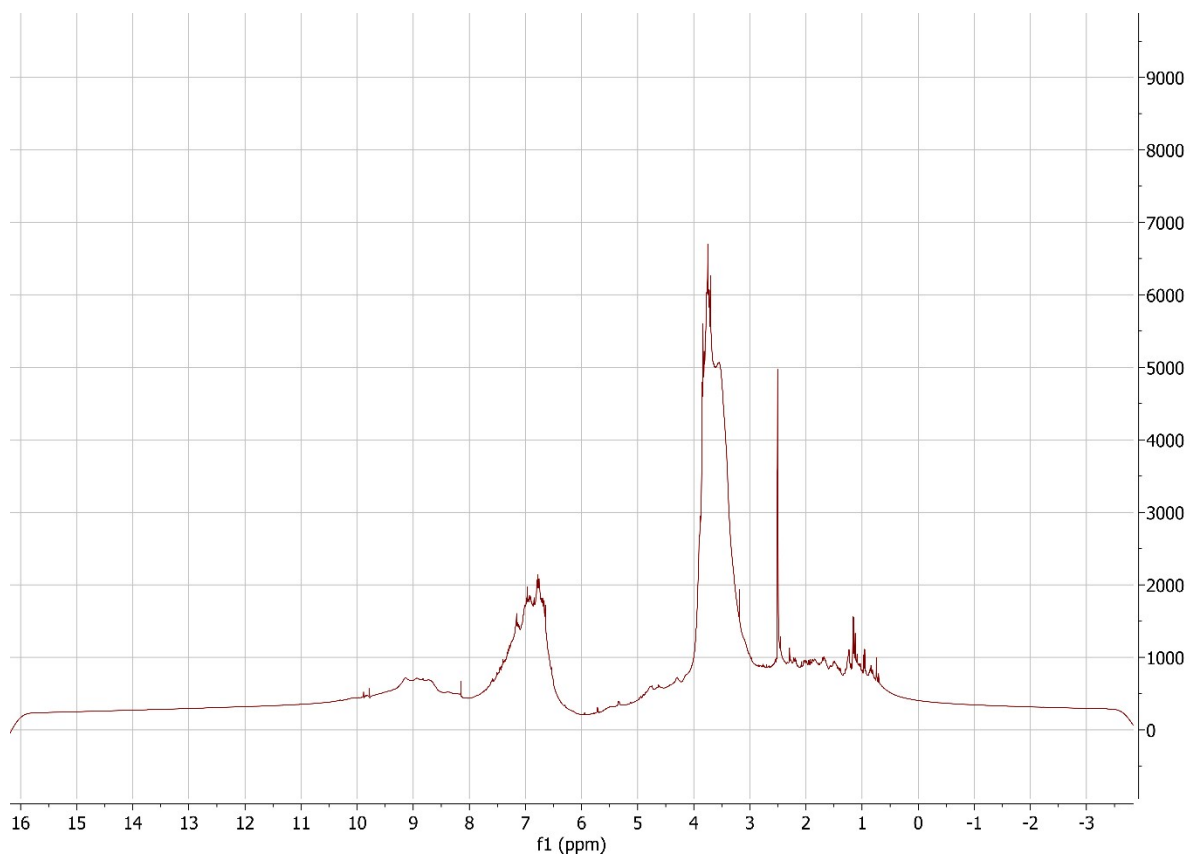

**Figure S17.** Kraft lignin, initial fraction

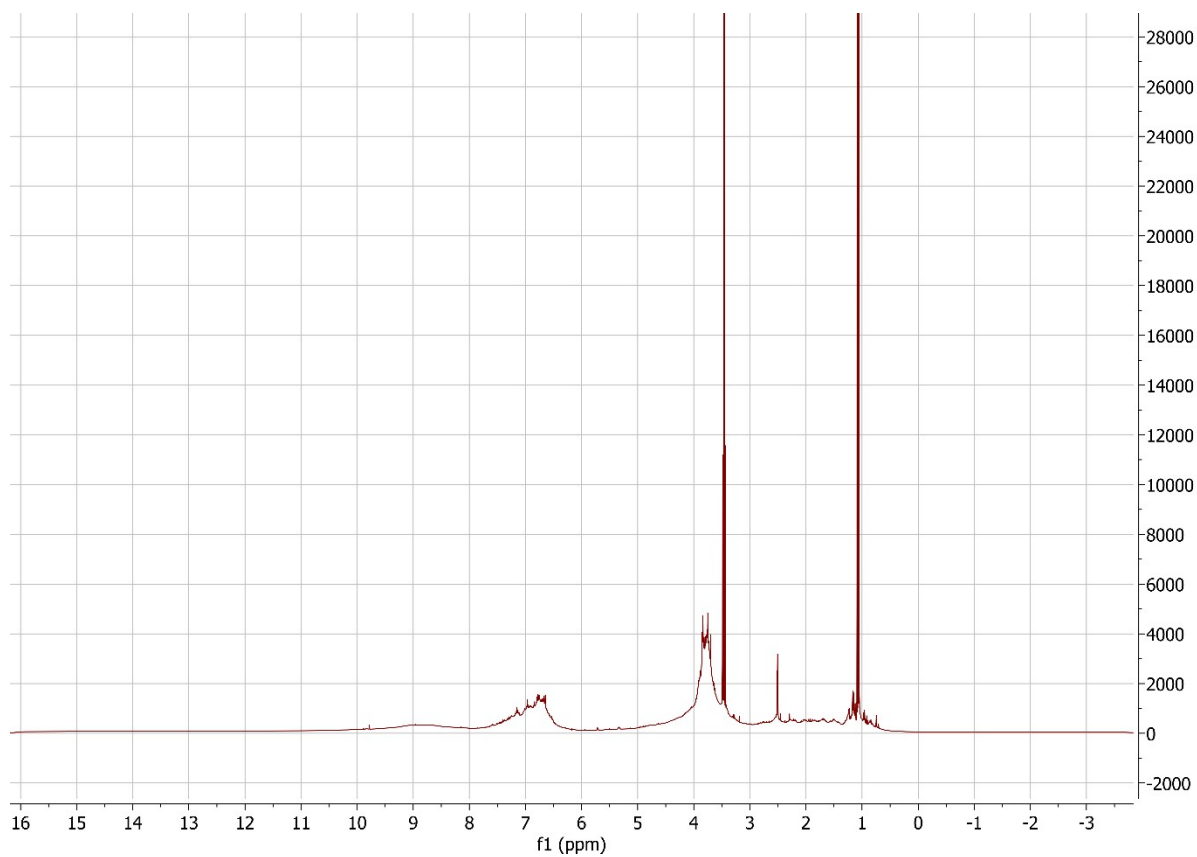

**Figure S18.** Kraft lignin, ethanol soluble fraction

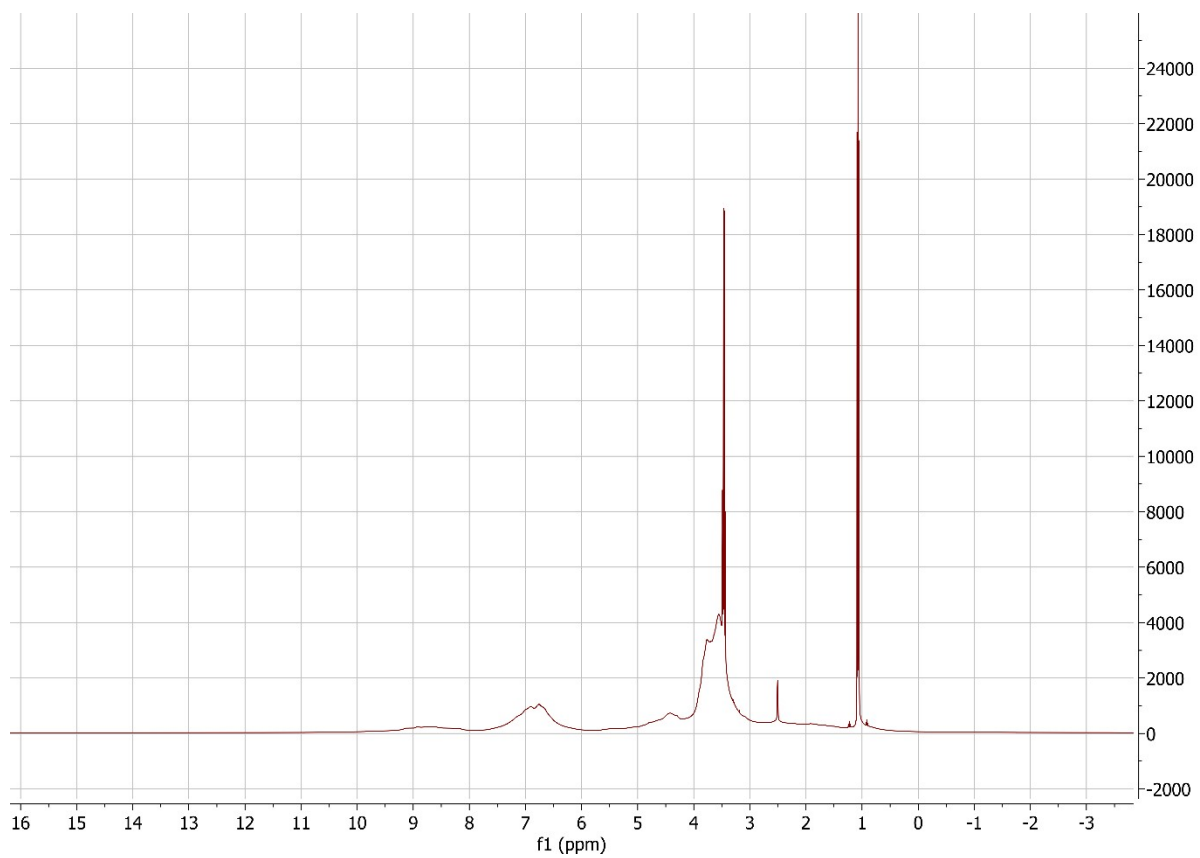

**Figure S19.** Kraft lignin, ethanol insoluble fraction

## 5. NMR of LNPs

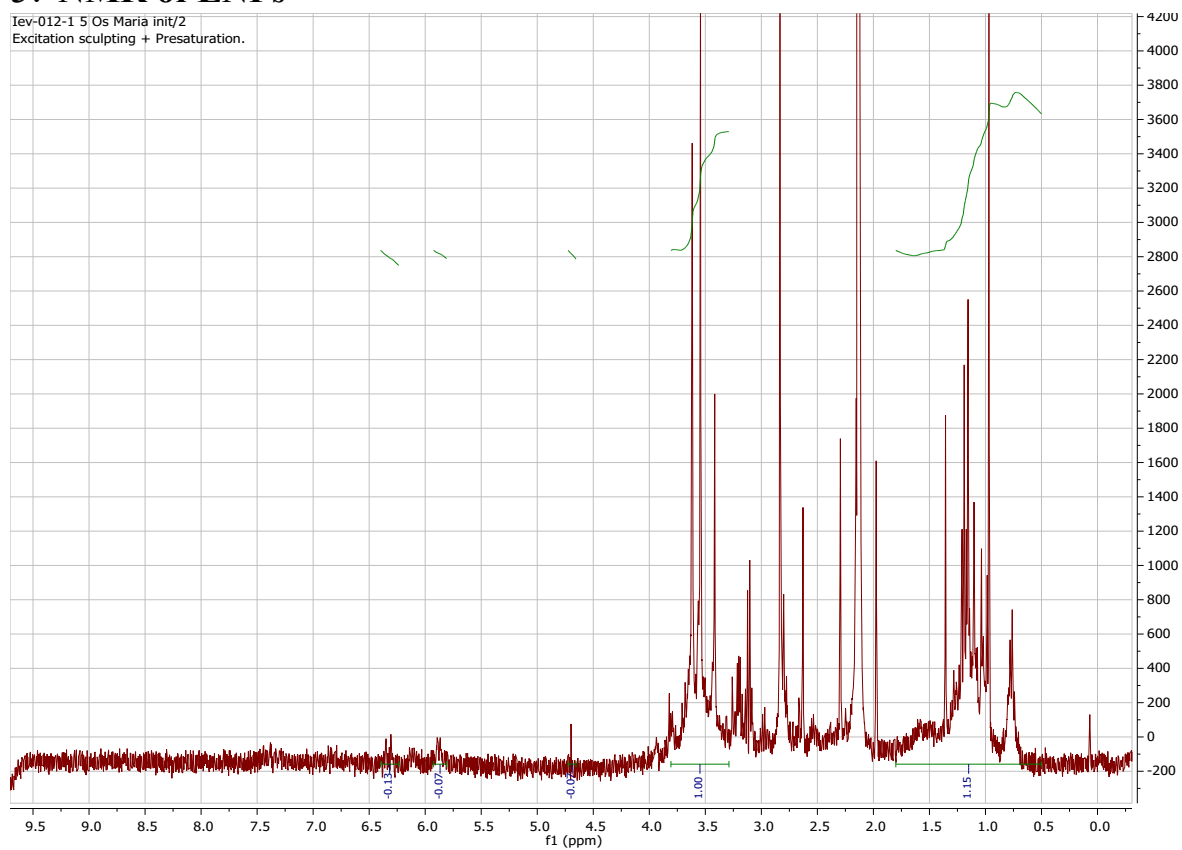

Figure S20. LNPs from OS protected lignin, initial fraction.

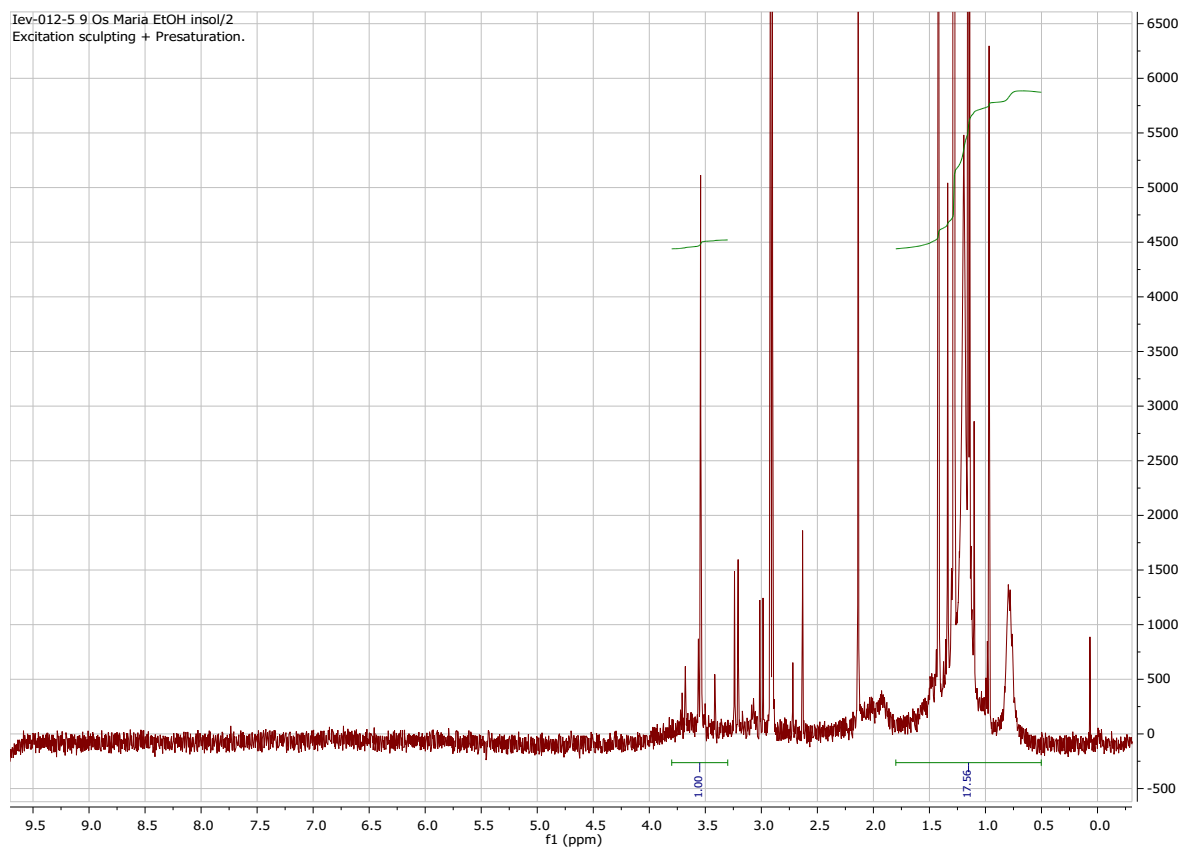

Figure S21. LNPs from OS protected lignin, ethanol insoluble fraction.



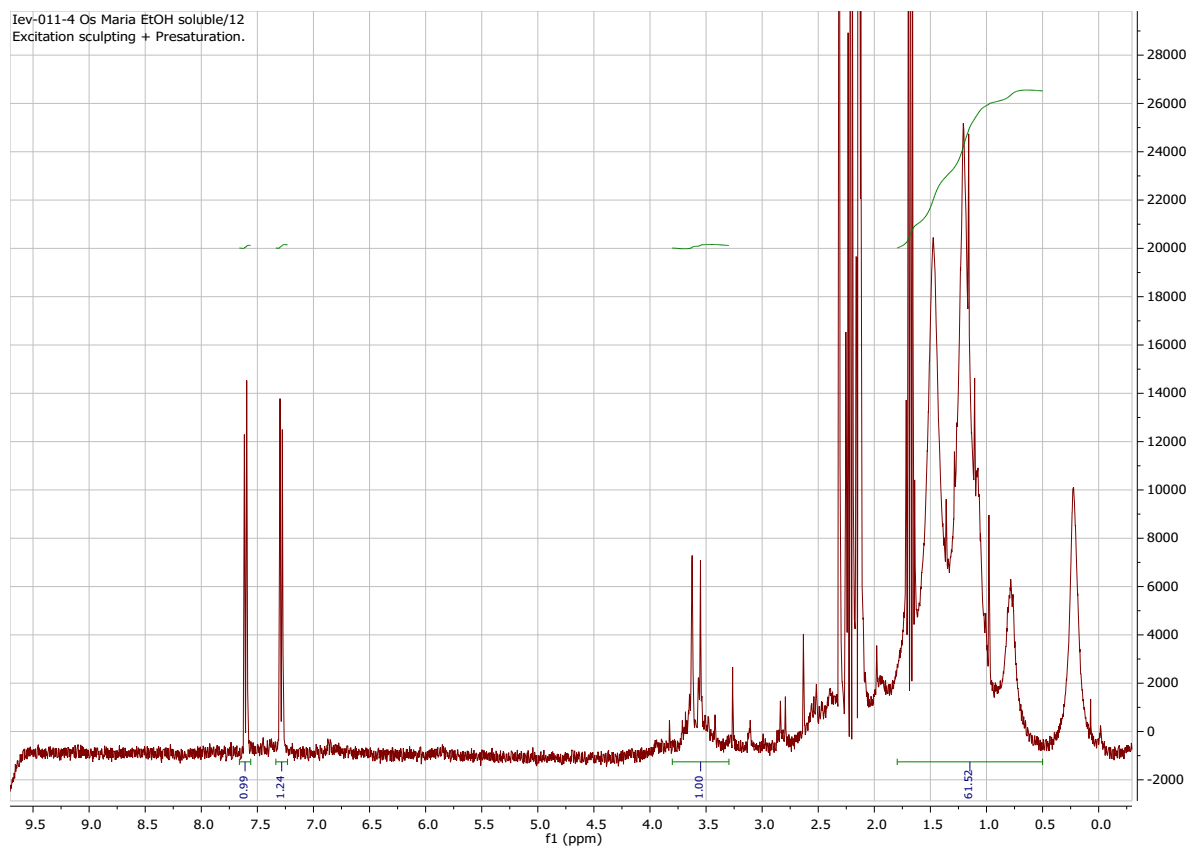

**Figure S22.** LNPs from OS protected lignin, ethanol soluble fraction.

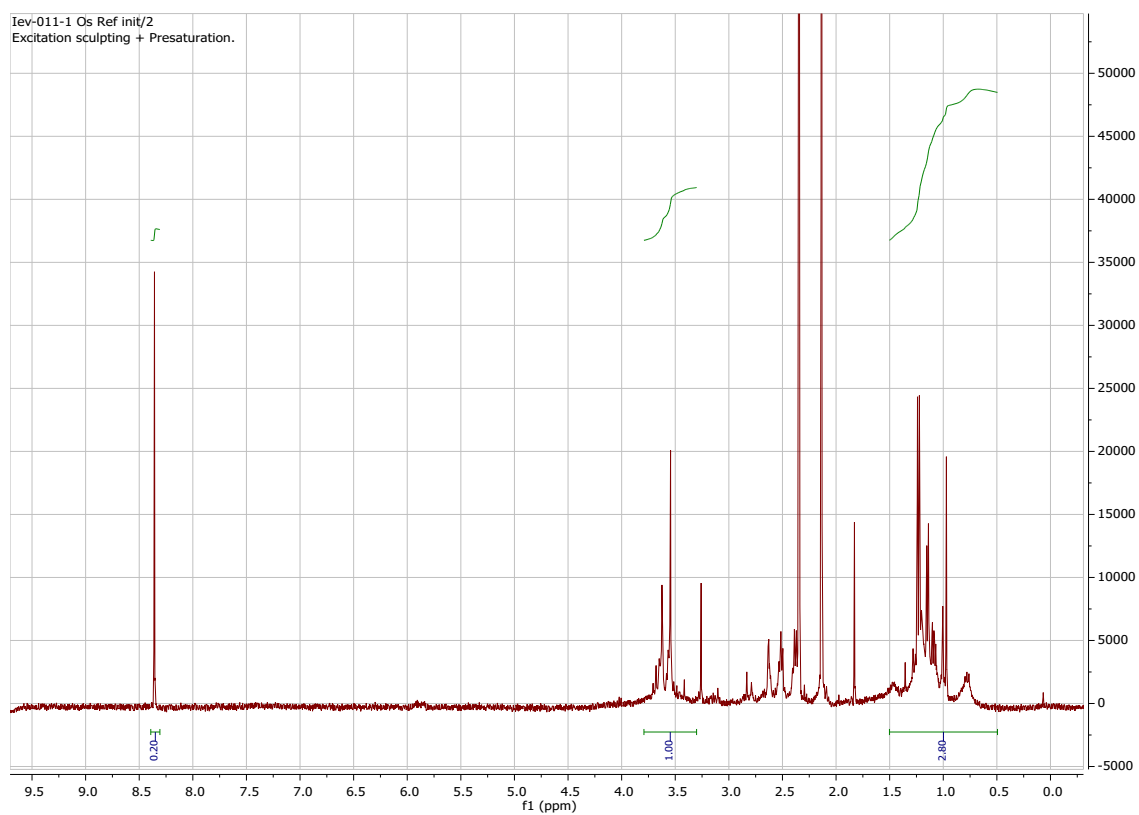

**Figure S23.** LNPs from OS reference lignin, initial fraction

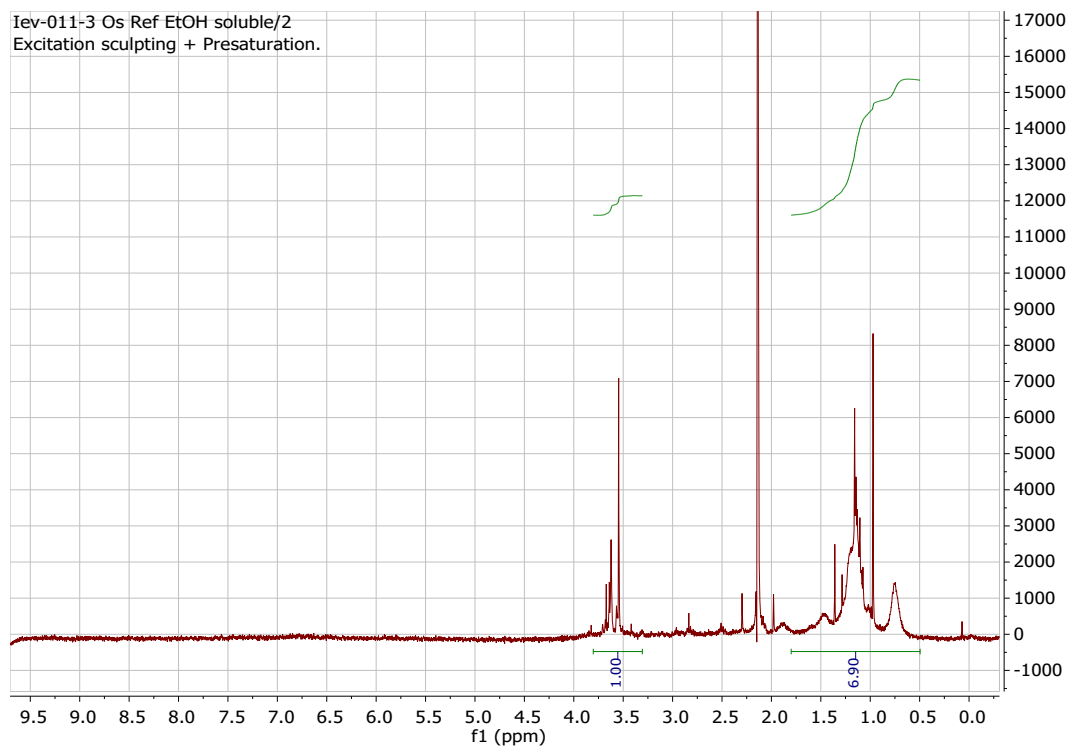

Figure S24. LNPs from OS reference lignin, ethanol soluble fraction.

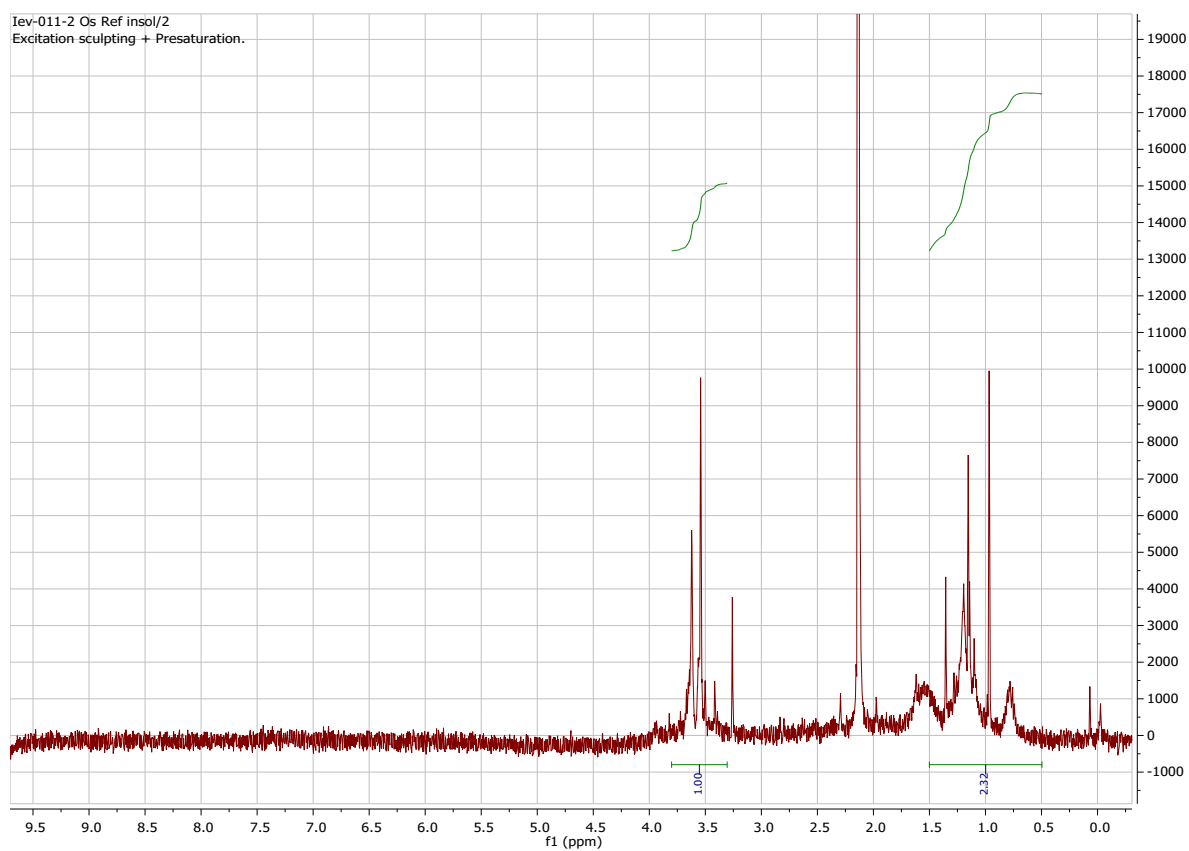

Figure S25. LNPs from OS reference lignin, ethanol insoluble fraction.

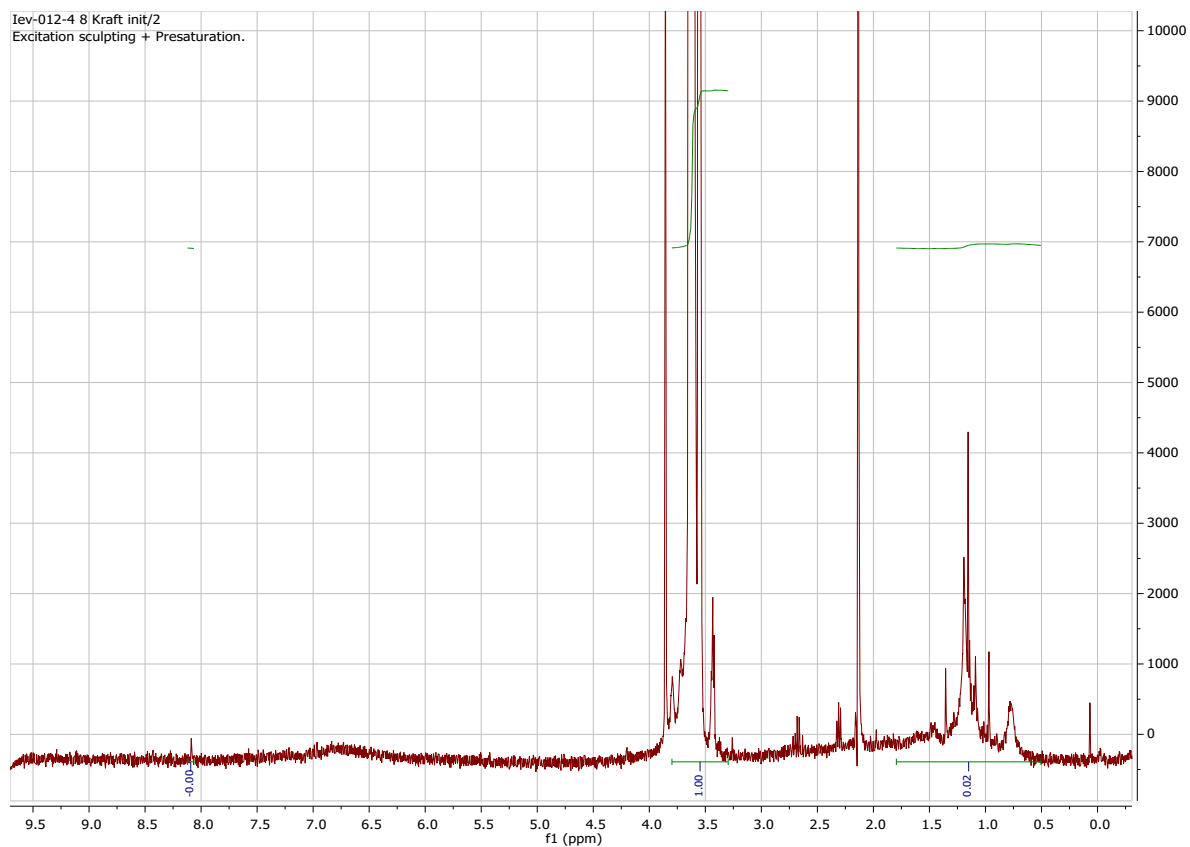

**Figure S26.** LNPs from kraft lignin, initial fraction.

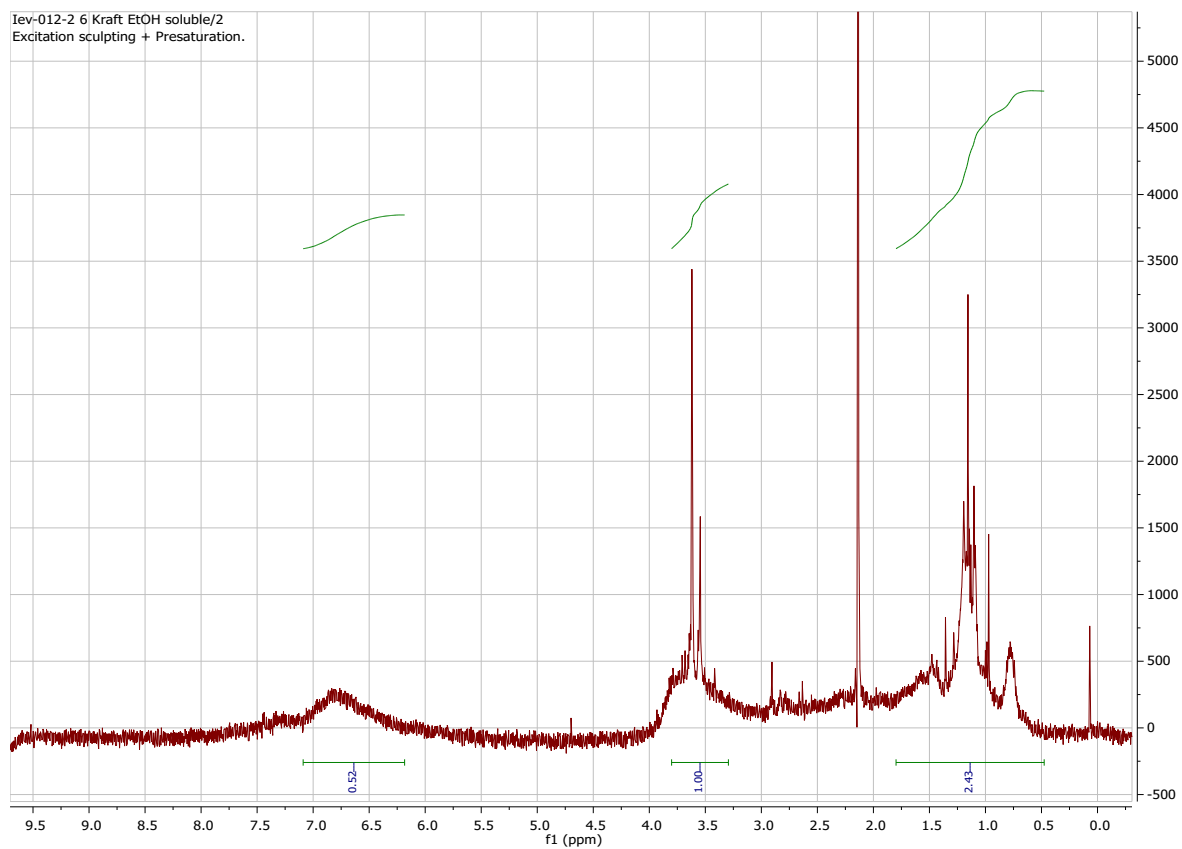

**Figure S27.** LNPs from kraft lignin, ethanol soluble fraction.

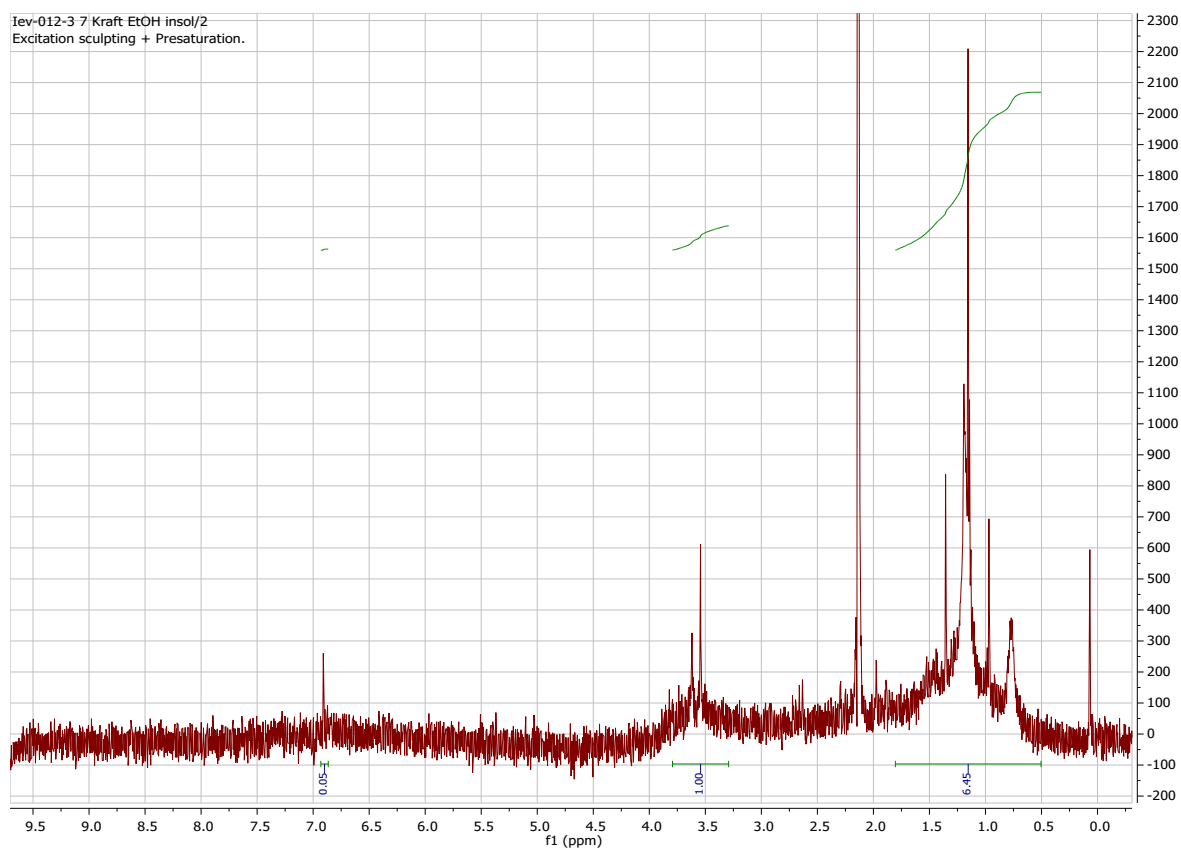

**Figure S28.** LNPs from kraft lignin, ethanol insoluble fraction.

**Table S7.** The integral intensities of some signals from the NMR of LNPs.

| LNPs from                      | Relative integral intensity at <b>3.80-3.30 ppm</b><br>(-OCH <sub>3</sub> from S- and G- units) | Relative integral intensity at <b>1.80-0.5 ppm</b><br>(nonoxygenated aliphatic) | Relative integral intensity at (aromatics)                                                                                  |
|--------------------------------|-------------------------------------------------------------------------------------------------|---------------------------------------------------------------------------------|-----------------------------------------------------------------------------------------------------------------------------|
| Ethanol soluble OS protected   | 1                                                                                               | 61.52                                                                           | dd<br>7.66-7.23 ppm<br>0.99+1.24<br>(coumaryl aldehyde and/or <b>Stilbene, <math>\beta</math>-5', C<math>\beta</math></b> ) |
| Initial OS protected           | 1                                                                                               | 1.15                                                                            | -                                                                                                                           |
| Ethanol insoluble OS protected | 1                                                                                               | 17.56                                                                           | -                                                                                                                           |
| Ethanol soluble OS Reference   | 1                                                                                               | 6.9                                                                             |                                                                                                                             |

|                                |   |      |                                                                                                                                                                        |
|--------------------------------|---|------|------------------------------------------------------------------------------------------------------------------------------------------------------------------------|
| Initial OS Reference           | 1 | 2.80 | s<br>8.39-8.31ppm<br>0.20                                                                                                                                              |
| Ethanol insoluble OS Reference | 1 | 2.33 |                                                                                                                                                                        |
| Ethanol soluble Kraft          | 1 | 2.43 | s 7.09-6.18 ppm<br>0.52<br>( <b>Stilbene, <math>\beta</math>-1', C<sub><math>\alpha</math></sub></b><br>and/or<br><b>Enol ether, C<sub><math>\alpha</math></sub></b> ) |
| Initial Kraft                  | 1 | 0.02 |                                                                                                                                                                        |
| Ethnaol insoluble Kraft        | 1 | 6.45 | S 6.93-6.87 ppm<br>0.05<br><b>Stilbene, <math>\beta</math>-1', C<sub><math>\alpha</math></sub></b>                                                                     |

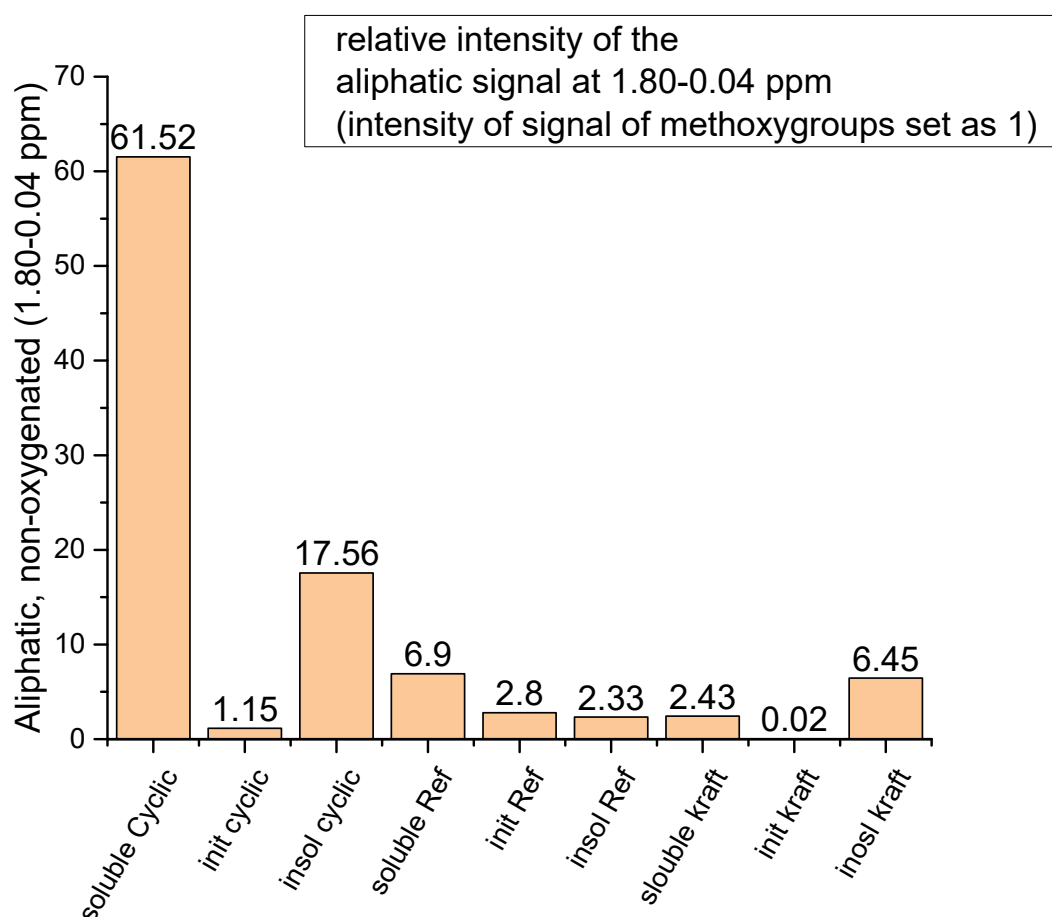

**Figure S29.** Relative intensity of the non-oxygenated aliphatic signal at 1.80-0.04 ppm (intensity of signal of methoxy groups set as 1). Please also look in Table S7.

## 6. Scheme of biorefinery processes

### 6.1. OS protected lignin

In relation to the organosolv lignins, cyclic extraction applies a biorefinery concept, where wood polymers are sequentially extracted, i.e., a stream of hemicellulose was extracted using subcritical water prior to the organosolv extraction of lignin. This biorefinery-based process aims to preserve the native lignin structure, where native-like lignin is extracted after the extraction of hemicelluloses at 160°C for 2 hours, using the principle of additive-free physical protection strategies during the extraction. The extraction was performed in fifteen cycles, each for five minutes, using an accelerated solvent extraction at a temperature of 160°C. This lignin is referred to as “protected lignin” where  $\beta$ -O-4' units are preserved.

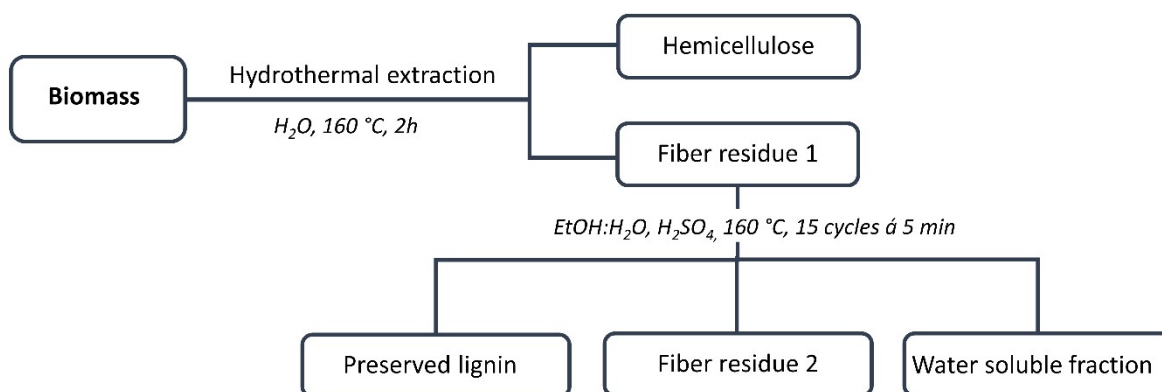

**Figure S30.** Scheme of the consolidated biorefinery process where lignin with preserved structure is extracted.

### 6.2. OS reference lignin

In the second biorefinery-based process, lignin was extracted based on an organosolv process subsequent to hemicellulose extraction, but in batch mode at 160°C for 2 hours. This lignin is referred to simply as “organosolv lignin”. Overall, these modifications when compared to the classical one-step organosolv process without pre-extraction of hemicellulose, improved the lignin purity.

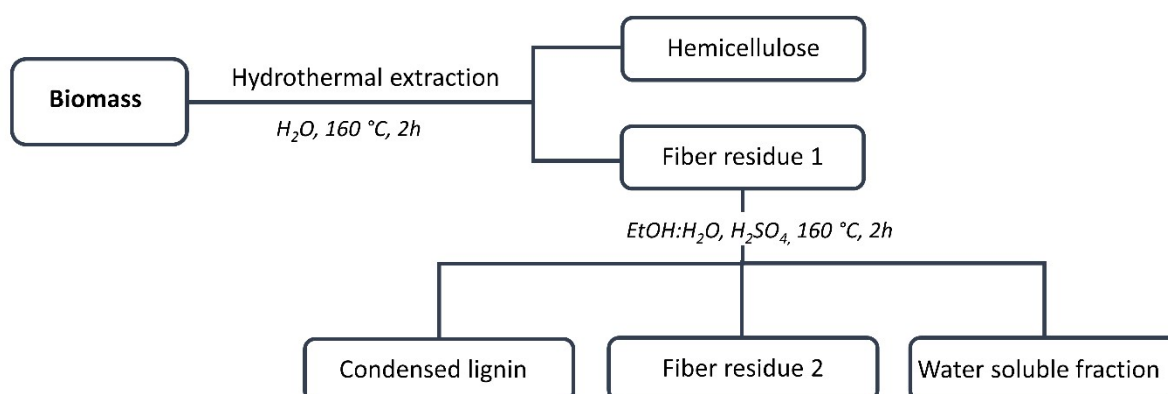

**Figure S31.** Scheme of the reference consolidated biorefinery process where a batch lignin is extracted.

## 7. $^{31}\text{P}$ NMR spectra of ethanol fractions

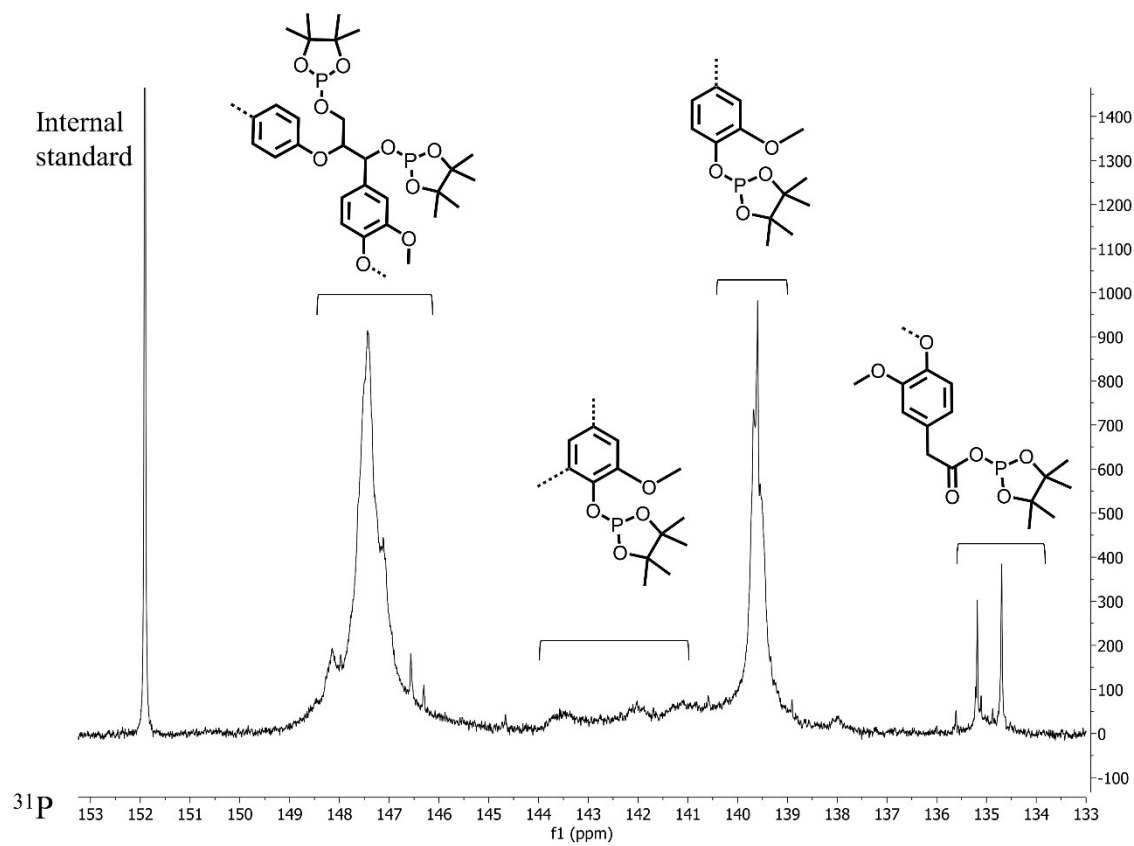

**Figure S32.**  $^{31}\text{P}$  NMR spectra of the ethanol soluble part of the fractionated OS protected lignin.

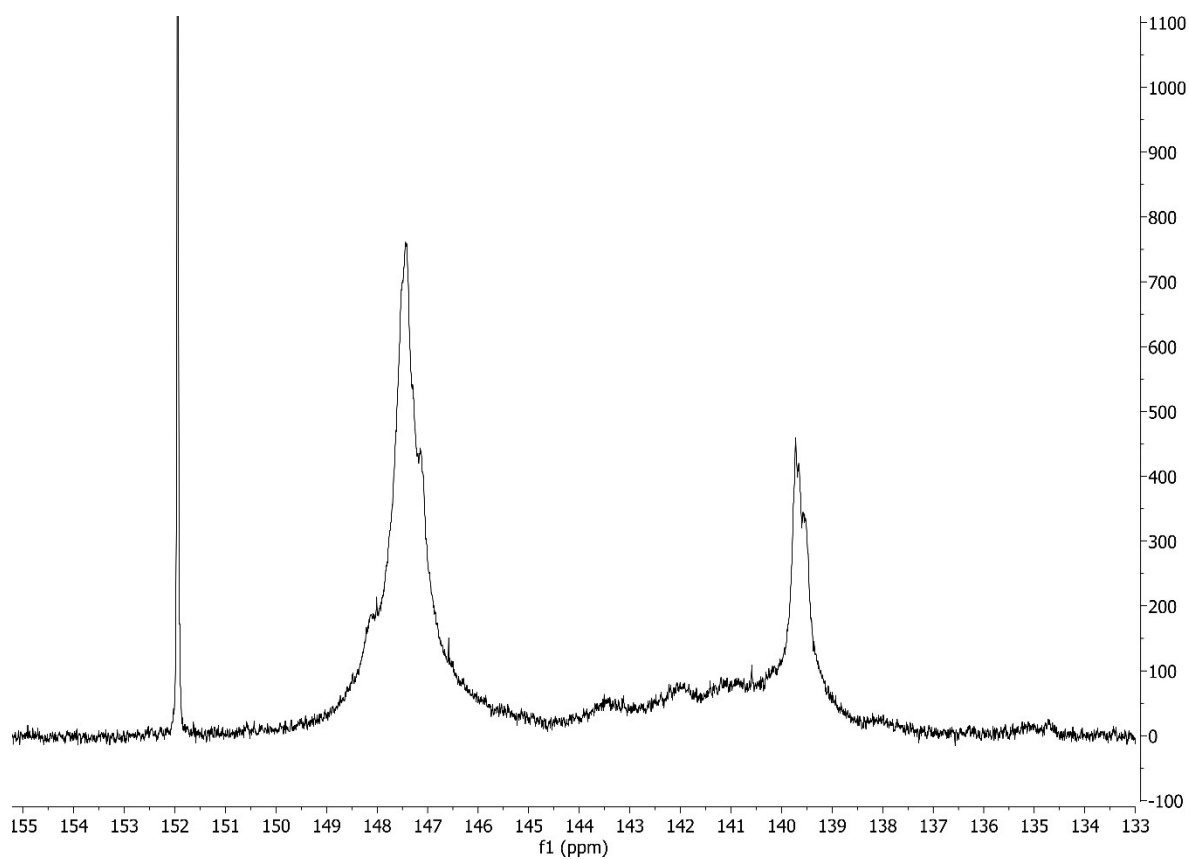

**Figure S33.**  $^{31}\text{P}$  NMR spectra of the ethanol insoluble part of the fractionated OS protected lignin.

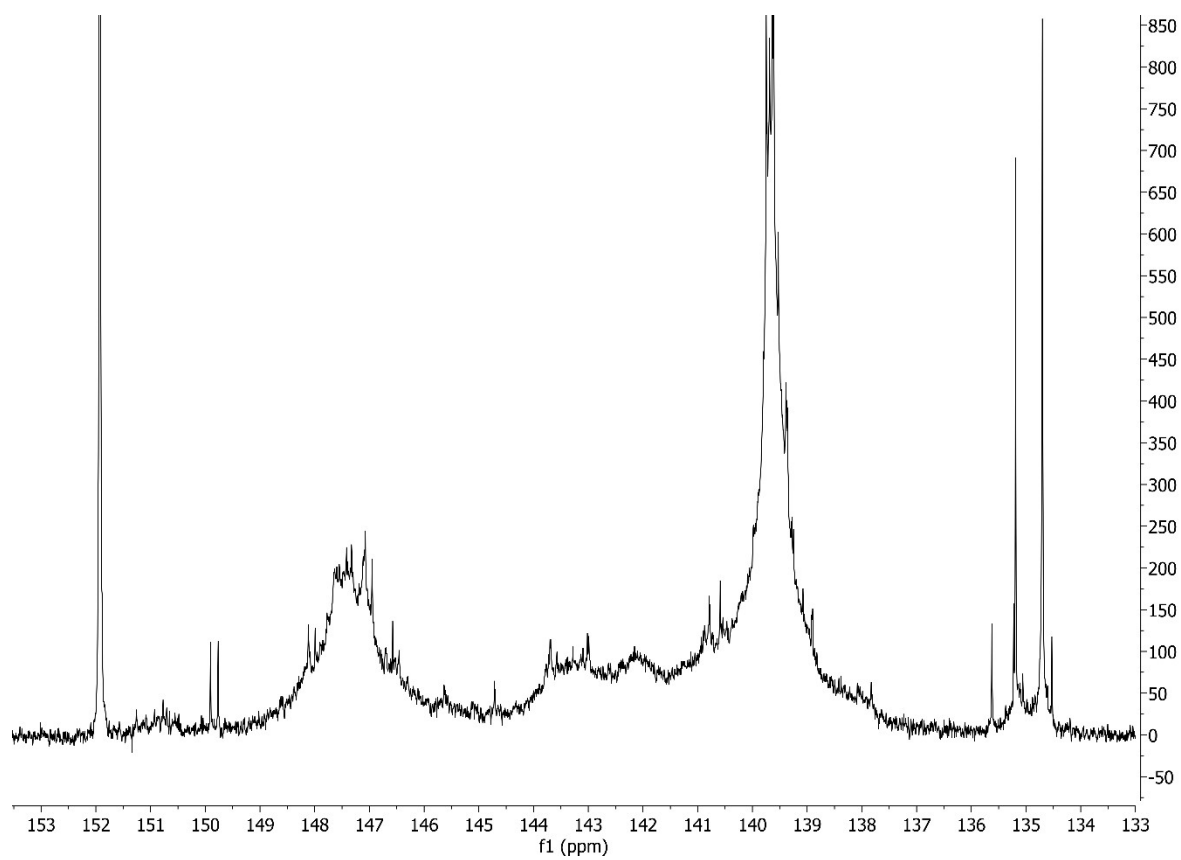

**Figure S34.**  $^{31}\text{P}$  NMR spectra of the ethanol soluble part of the fractionated OS reference lignin



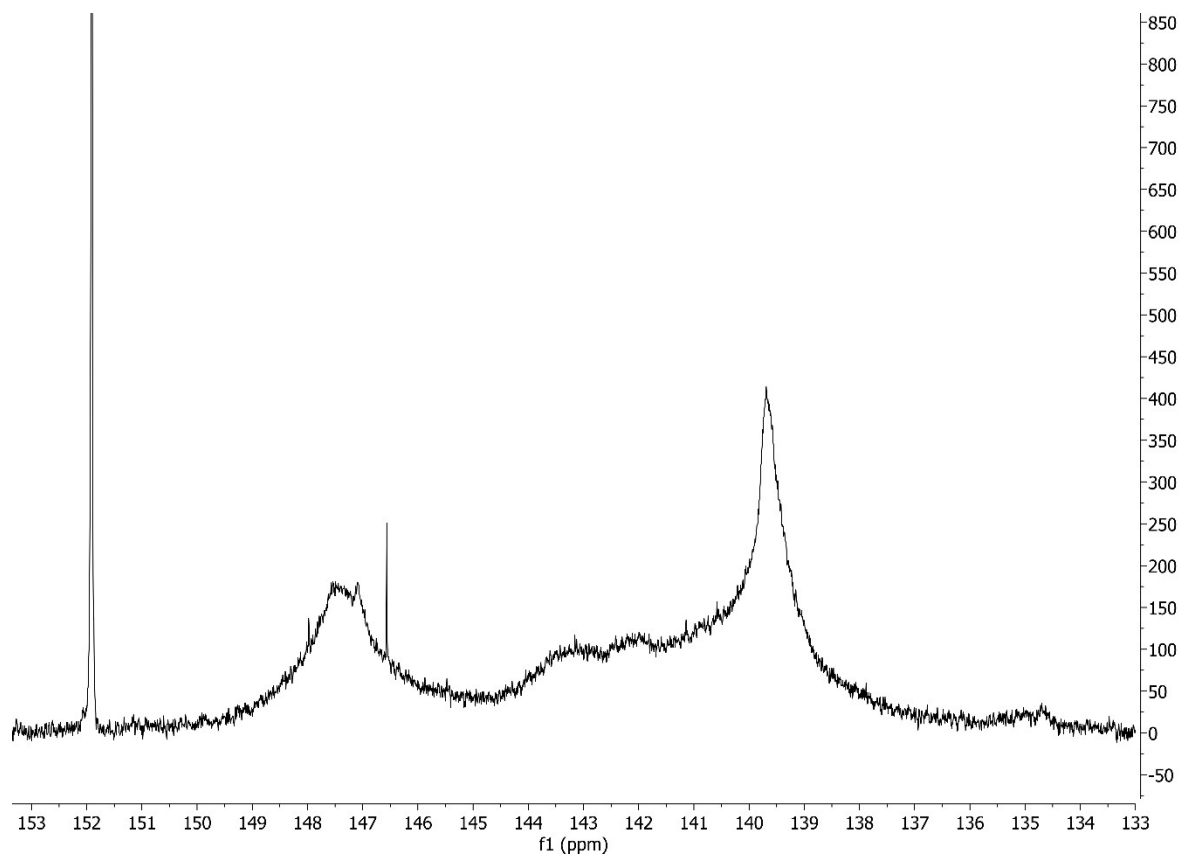

**Figure S35.**  $^{31}\text{P}$  NMR spectra of the ethanol insoluble part of the fractionated OS reference lignin.

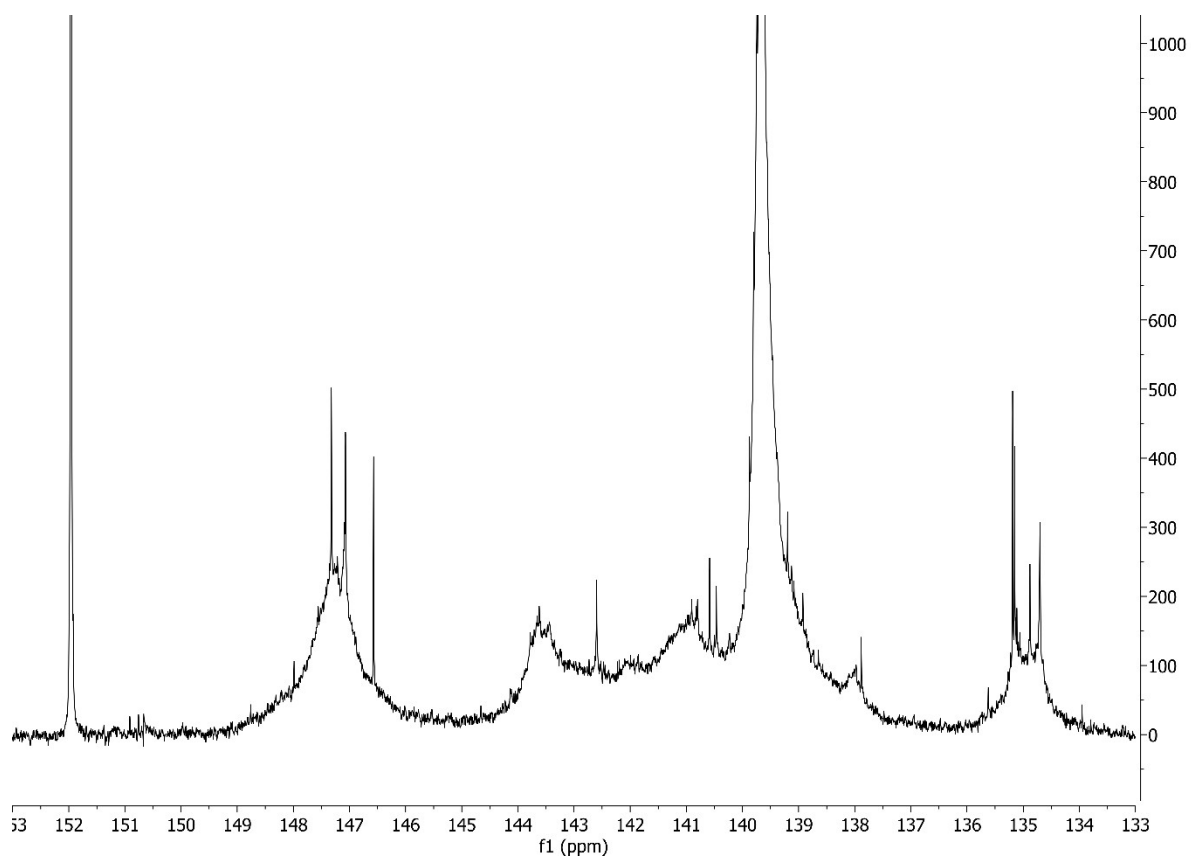

**Figure S36.**  $^{31}\text{P}$  NMR spectra of the ethanol soluble part of the fractionated kraft lignin.

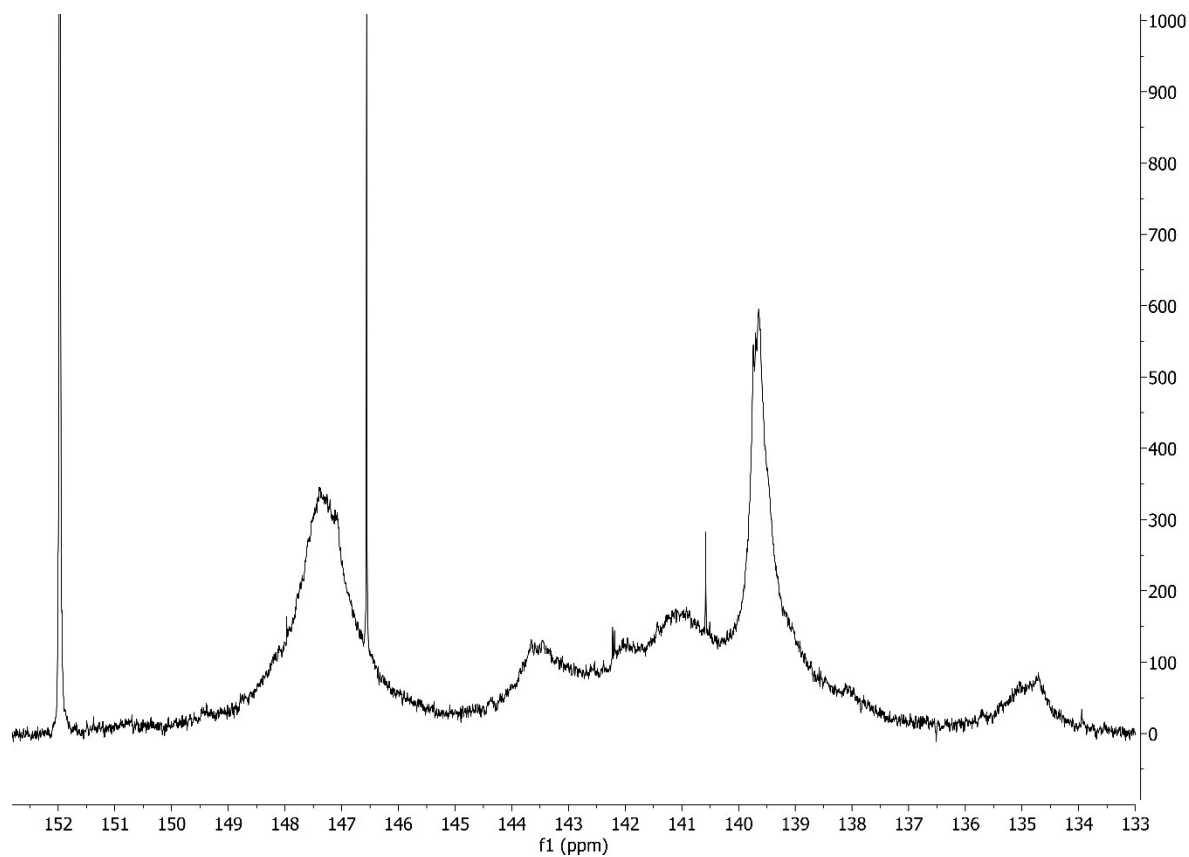

**Figure S37.**  $^{31}\text{P}$  NMR spectra of the ethanol insoluble part of the fractionated kraft lignin.

## 8. Extraction and ethanol fractionation yield

**Table S8.** The absolute dry mass% of the fractions after ethanol fractionation.

| Lignin       | Extracted lignin yield<br>[mass%] <sup>1</sup> | EtOH soluble [mass%] | EtOH insoluble [mass%] |
|--------------|------------------------------------------------|----------------------|------------------------|
| OS protected | 54                                             | 45.8                 | 53.4                   |
| OS reference | 48                                             | 45.4                 | 53.3                   |
| Kraft        | -                                              | 42.7                 | 56.7                   |

<sup>1</sup>Assuming 27% lignin in spruce wood.

## 9. Lignin structures

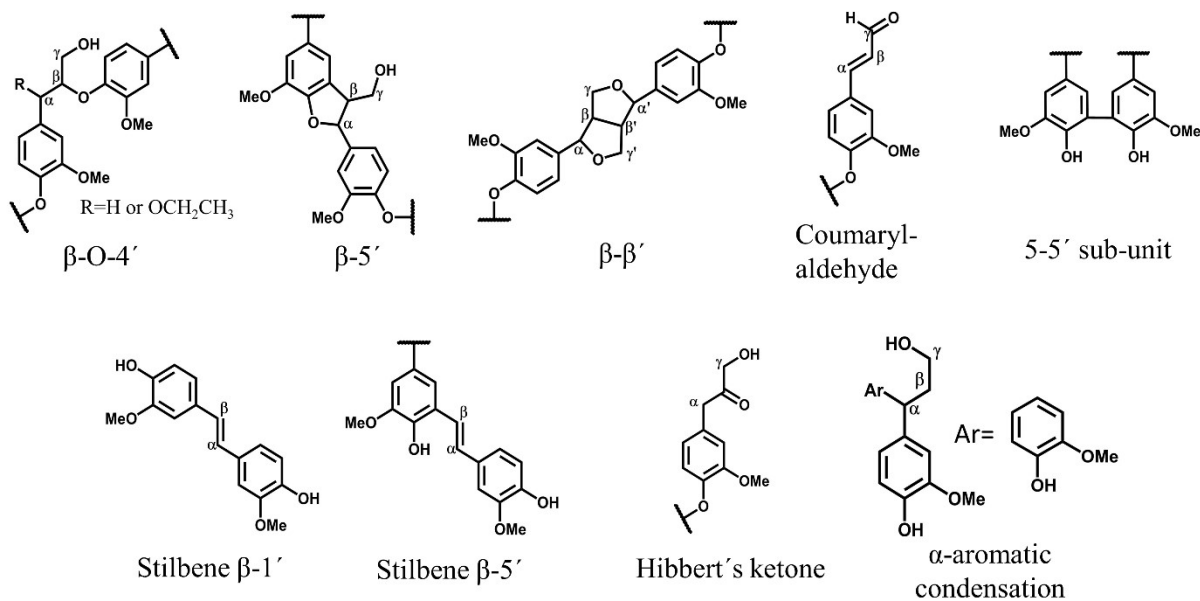

Figure S38. Identified structures in the lignin fractions.

## 10. DFT: Molecular volume

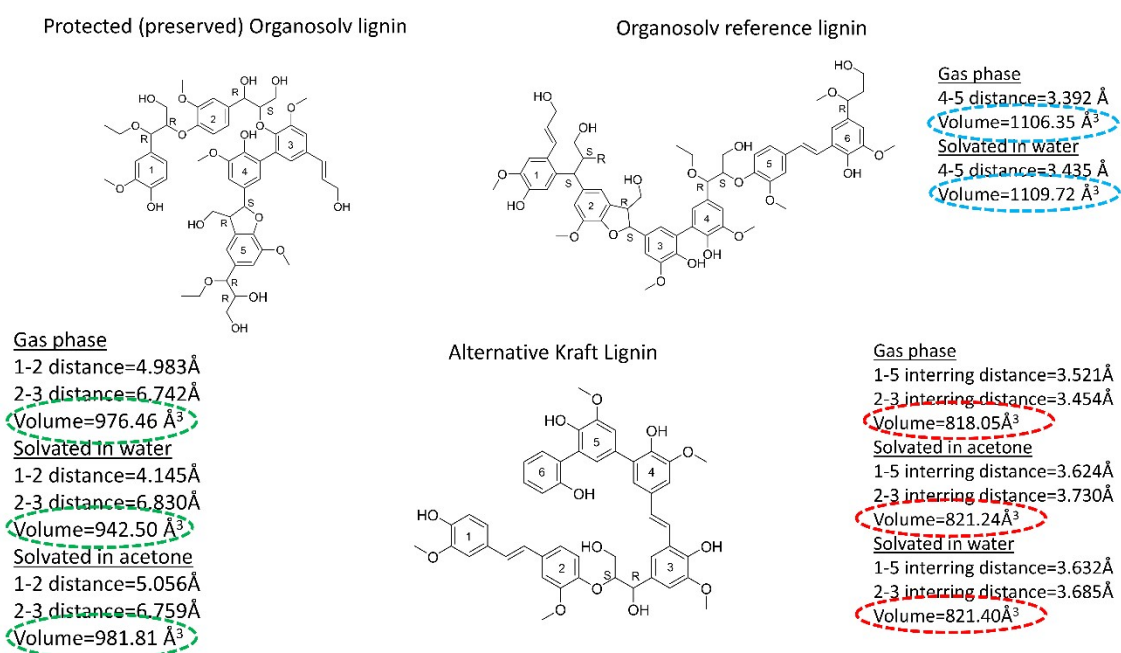

Figure S39. Molecular volume in different systems.
